# Supplementary material for: The History and Diversity of Rice Domestication as Resolved From 1464 Complete Plastid Genomes
Source: Front Plant Sci. 2021 Nov 18;12:781793. doi: 10.3389/fpls.2021.781793 (PMC8637288; doi:10.3389/fpls.2021.781793)
Supplement: Supplementary file 1 [file Table_1.XLSX]

## Sheet: Table S1
Table S1 The 1445 cultivated and wild rice accessions used in this study
ID	Type	Group	Origin	Lat	Long	Plastomic haplotype	Used in time tree construction
CX112	Aro	Or-J-I	Japan	NA	NA	Hap_4	Yes
IRIS_313-10051	Aro	Or-J-I	Madagascar	NA	NA	Hap_5	Yes
IRIS_313-10864	Aro	Or-J-I	India	NA	NA	Hap_4	Yes
IRIS_313-11066	Aro	Or-J-I	Bangladesh	NA	NA	Hap_4	Yes
IRIS_313-11068	Aro	Or-J-I	Bangladesh	NA	NA	Hap_4	Yes
IRIS_313-11069	Aro	Or-J-I	Bangladesh	NA	NA	Hap_4	Yes
IRIS_313-11070	Aro	Or-J-I	Bangladesh	NA	NA	Hap_4	Yes
IRIS_313-11259	Aro	Or-J-I	India	NA	NA	Hap_5	Yes
IRIS_313-11297	Aro	Or-J-I	India	NA	NA	Hap_28	No
IRIS_313-11352	Aro	Or-J-I	India	NA	NA	Hap_5	Yes
IRIS_313-11401	Aro	Or-J-I	Bangladesh	NA	NA	Hap_5	Yes
IRIS_313-8664	Aro	Or-J-I	Indonesia	NA	NA	Hap_5	Yes
IRIS_313-8712	Aro	Or-J-I	India	NA	NA	Hap_5	Yes
IRIS_313-10164	Aus	Or-J-I	China	NA	NA	Hap_1	Yes
IRIS_313-11661	Aus	Or-J-I	Bhutan	NA	NA	Hap_1	Yes
IRIS_313-8125	Aus	Or-J-I	Bulgaria	NA	NA	Hap_12	Yes
IRIS_313-8218	Aus	Or-J-I	Egypt	NA	NA	Hap_1	Yes
IRIS_313-9937	Aus	Or-J-I	Italy	NA	NA	Hap_1	Yes
IRIS_313-9949	Aus	Or-J-I	Sri Lanka	NA	NA	Hap_5	Yes
B128	Ind	Or-J-I	China	NA	NA	Hap_3	No
CX218	Ind	Or-J-I	India	NA	NA	Hap_1	Yes
CX249	Ind	Or-J-I	China	NA	NA	Hap_1	Yes
CX273	Ind	Or-J-I	India	NA	NA	Hap_1	Yes
CX288	Ind	Or-J-I	India	NA	NA	Hap_1	Yes
CX316	Ind	Or-J-I	Malaysia	NA	NA	Hap_1	Yes
IRIS_313-10048	Ind	Or-J-I	Benin	NA	NA	Hap_5	Yes
IRIS_313-10114	Ind	Or-J-I	Burundi	NA	NA	Hap_5	Yes
IRIS_313-10449	Ind	Or-J-I	China	NA	NA	Hap_13	Yes
IRIS_313-10810	Ind	Or-J-I	Indonesia	NA	NA	Hap_5	Yes
IRIS_313-10947	Ind	Or-J-I	Indonesia	NA	NA	Hap_19	Yes
IRIS_313-11479	Ind	Or-J-I	India	NA	NA	Hap_19	Yes
IRIS_313-11564	Ind	Or-J-I	Nepal	NA	NA	Hap_5	Yes
IRIS_313-11803	Ind	Or-J-I	China	NA	NA	Hap_5	Yes
IRIS_313-11930	Ind	Or-J-I	Nigeria	NA	NA	Hap_5	Yes
IRIS_313-7773	Ind	Or-J-I	Malaysia	NA	NA	Hap_1	Yes
IRIS_313-7863	Ind	Or-J-I	Brazil	NA	NA	Hap_5	Yes
IRIS_313-8037	Ind	Or-J-I	Italy	NA	NA	Hap_5	Yes
IRIS_313-8128	Ind	Or-J-I	Argentina	NA	NA	Hap_5	Yes
IRIS_313-8137	Ind	Or-J-I	Portugal	NA	NA	Hap_1	Yes
IRIS_313-8143	Ind	Or-J-I	Bulgaria	NA	NA	Hap_5	Yes
IRIS_313-8314	Ind	Or-J-I	Indonesia	NA	NA	Hap_5	Yes
IRIS_313-8519	Ind	Or-J-I	Bhutan	NA	NA	Hap_6	No
IRIS_313-9249	Ind	Or-J-I	Cambodia	NA	NA	Hap_5	Yes
IRIS_313-9348	Ind	Or-J-I	India	NA	NA	Hap_1	Yes
IRIS_313-9506	Ind	Or-J-I	Bhutan	NA	NA	Hap_11	No
IRIS_313-9795	Ind	Or-J-I	Australia	NA	NA	Hap_1	Yes
IRIS_313-10705	Inter	Or-J-I	Malaysia	NA	NA	Hap_5	Yes
IRIS_313-11223	Inter	Or-J-I	Bangladesh	NA	NA	Hap_15	No
IRIS_313-11425	Inter	Or-J-I	Brazil	NA	NA	Hap_5	Yes
IRIS_313-8168	Inter	Or-J-I	France	NA	NA	Hap_5	Yes
IRIS_313-8999	Inter	Or-J-I	India	NA	NA	Hap_17	No
IRIS_313-9053	Inter	Or-J-I	India	NA	NA	Hap_4	Yes
IRIS_313-9140	Inter	Or-J-I	China	NA	NA	Hap_1	Yes
IRIS_313-9814	Inter	Or-J-I	Hungary	NA	NA	Hap_5	Yes
B014	Jap	Or-J-I	Uzbekistan	NA	NA	Hap_1	Yes
B055	Jap	Or-J-I	Australia	NA	NA	Hap_1	Yes
CX109	Jap	Or-J-I	India	NA	NA	Hap_1	Yes
CX241	Jap	Or-J-I	Brazil	NA	NA	Hap_5	Yes
CX251	Jap	Or-J-I	China	NA	NA	Hap_1	Yes
CX351	Jap	Or-J-I	China	NA	NA	Hap_1	Yes
CX384	Jap	Or-J-I	China	NA	NA	Hap_1	Yes
IRIS_313-10061	Jap	Or-J-I	Portugal	NA	NA	Hap_5	Yes
IRIS_313-10459	Jap	Or-J-I	China	NA	NA	Hap_5	Yes
IRIS_313-10562	Jap	Or-J-I	China	NA	NA	Hap_5	Yes
IRIS_313-10649	Jap	Or-J-I	Philippines	NA	NA	Hap_5	Yes
IRIS_313-10689	Jap	Or-J-I	Indonesia	NA	NA	Hap_5	Yes
IRIS_313-10693	Jap	Or-J-I	Indonesia	NA	NA	Hap_5	Yes
IRIS_313-10740	Jap	Or-J-I	Indonesia	NA	NA	Hap_5	Yes
IRIS_313-10741	Jap	Or-J-I	Indonesia	NA	NA	Hap_5	Yes
IRIS_313-10746	Jap	Or-J-I	Indonesia	NA	NA	Hap_22	Yes
IRIS_313-10765	Jap	Or-J-I	Indonesia	NA	NA	Hap_22	Yes
IRIS_313-10767	Jap	Or-J-I	Indonesia	NA	NA	Hap_5	Yes
IRIS_313-10780	Jap	Or-J-I	Indonesia	NA	NA	Hap_5	Yes
IRIS_313-10783	Jap	Or-J-I	Indonesia	NA	NA	Hap_5	Yes
IRIS_313-10784	Jap	Or-J-I	Indonesia	NA	NA	Hap_5	Yes
IRIS_313-10788	Jap	Or-J-I	Indonesia	NA	NA	Hap_5	Yes
IRIS_313-10790	Jap	Or-J-I	Indonesia	NA	NA	Hap_22	Yes
IRIS_313-10808	Jap	Or-J-I	Indonesia	NA	NA	Hap_5	Yes
IRIS_313-10809	Jap	Or-J-I	Indonesia	NA	NA	Hap_22	Yes
IRIS_313-10815	Jap	Or-J-I	Indonesia	NA	NA	Hap_22	Yes
IRIS_313-10817	Jap	Or-J-I	Indonesia	NA	NA	Hap_5	Yes
IRIS_313-10841	Jap	Or-J-I	Indonesia	NA	NA	Hap_5	Yes
IRIS_313-10918	Jap	Or-J-I	Philippines	NA	NA	Hap_19	Yes
IRIS_313-10919	Jap	Or-J-I	Philippines	NA	NA	Hap_5	Yes
IRIS_313-10920	Jap	Or-J-I	Philippines	NA	NA	Hap_5	Yes
IRIS_313-10950	Jap	Or-J-I	Indonesia	NA	NA	Hap_19	Yes
IRIS_313-10994	Jap	Or-J-I	Philippines	NA	NA	Hap_5	Yes
IRIS_313-11005	Jap	Or-J-I	Indonesia	NA	NA	Hap_19	Yes
IRIS_313-11008	Jap	Or-J-I	Indonesia	NA	NA	Hap_19	Yes
IRIS_313-11311	Jap	Or-J-I	Indonesia	NA	NA	Hap_5	Yes
IRIS_313-11971	Jap	Or-J-I	Indonesia	NA	NA	Hap_5	Yes
IRIS_313-7993	Jap	Or-J-I	Madagascar	NA	NA	Hap_5	Yes
IRIS_313-8050	Jap	Or-J-I	Italy	NA	NA	Hap_1	Yes
IRIS_313-8057	Jap	Or-J-I	Argentina	NA	NA	Hap_5	Yes
IRIS_313-8217	Jap	Or-J-I	Egypt	NA	NA	Hap_1	Yes
IRIS_313-9101	Jap	Or-J-I	Malaysia	NA	NA	Hap_5	Yes
IRIS_313-9691	Jap	Or-J-I	Indonesia	NA	NA	Hap_5	Yes
IRIS_313-9897	Jap	Or-J-I	Philippines	NA	NA	Hap_5	Yes
W3027	OR	Or-J-I	China	NA	NA	Hap_5	Yes
W2061	OR	Or-J-I	Bangladesh	NA	NA	Hap_1	Yes
B001	TemJ	Or-J-I	China	NA	NA	Hap_1	Yes
B003	TemJ	Or-J-I	China	NA	NA	Hap_10	Yes
B004	TemJ	Or-J-I	Japan	NA	NA	Hap_1	Yes
B008	TemJ	Or-J-I	Viet Nam	NA	NA	Hap_1	Yes
B034	TemJ	Or-J-I	Albania	NA	NA	Hap_1	Yes
B038	TemJ	Or-J-I	Egypt	NA	NA	Hap_1	Yes
B046	TemJ	Or-J-I	Japan	NA	NA	Hap_1	Yes
B057	TemJ	Or-J-I	China	NA	NA	Hap_1	Yes
B068	TemJ	Or-J-I	China	NA	NA	Hap_5	Yes
B100	TemJ	Or-J-I	China	NA	NA	Hap_5	Yes
B102	TemJ	Or-J-I	China	NA	NA	Hap_5	Yes
B168	TemJ	Or-J-I	Japan	NA	NA	Hap_10	Yes
B170	TemJ	Or-J-I	Russia	NA	NA	Hap_1	Yes
B171	TemJ	Or-J-I	Italy	NA	NA	Hap_1	Yes
B182	TemJ	Or-J-I	Japan	NA	NA	Hap_1	Yes
B212	TemJ	Or-J-I	China	NA	NA	Hap_5	Yes
B225	TemJ	Or-J-I	China	NA	NA	Hap_31	No
B226	TemJ	Or-J-I	China	NA	NA	Hap_12	Yes
B230	TemJ	Or-J-I	China	NA	NA	Hap_5	Yes
B240	TemJ	Or-J-I	China	NA	NA	Hap_1	Yes
B250	TemJ	Or-J-I	China	NA	NA	Hap_1	Yes
B263	TemJ	Or-J-I	China	NA	NA	Hap_1	Yes
B269	TemJ	Or-J-I	Japan	NA	NA	Hap_1	Yes
CX116	TemJ	Or-J-I	Democratic People's Republic of Korea	NA	NA	Hap_1	Yes
CX140	TemJ	Or-J-I	Japan	NA	NA	Hap_1	Yes
CX165	TemJ	Or-J-I	China	NA	NA	Hap_1	Yes
CX211	TemJ	Or-J-I	China	NA	NA	Hap_1	Yes
CX212	TemJ	Or-J-I	Japan	NA	NA	Hap_1	Yes
CX315	TemJ	Or-J-I	Democratic People's Republic of Korea	NA	NA	Hap_1	Yes
CX356	TemJ	Or-J-I	China	NA	NA	Hap_1	Yes
CX383	TemJ	Or-J-I	China	NA	NA	Hap_1	Yes
CX391	TemJ	Or-J-I	China	NA	NA	Hap_1	Yes
CX397	TemJ	Or-J-I	China	NA	NA	Hap_1	Yes
CX56	TemJ	Or-J-I	China	NA	NA	Hap_1	Yes
CX78	TemJ	Or-J-I	United States of America	NA	NA	Hap_1	Yes
IRIS_313-10056	TemJ	Or-J-I	Japan	NA	NA	Hap_5	Yes
IRIS_313-10083	TemJ	Or-J-I	Spain	NA	NA	Hap_1	Yes
IRIS_313-10089	TemJ	Or-J-I	Bulgaria	NA	NA	Hap_5	Yes
IRIS_313-10093	TemJ	Or-J-I	Korea, Republic of	NA	NA	Hap_1	Yes
IRIS_313-10111	TemJ	Or-J-I	Italy	NA	NA	Hap_5	Yes
IRIS_313-10242	TemJ	Or-J-I	Hungary	NA	NA	Hap_5	Yes
IRIS_313-10327	TemJ	Or-J-I	Peru	NA	NA	Hap_5	Yes
IRIS_313-10379	TemJ	Or-J-I	Philippines	NA	NA	Hap_1	Yes
IRIS_313-10437	TemJ	Or-J-I	Japan	NA	NA	Hap_1	Yes
IRIS_313-10440	TemJ	Or-J-I	Philippines	NA	NA	Hap_30	No
IRIS_313-10453	TemJ	Or-J-I	China	NA	NA	Hap_10	Yes
IRIS_313-10469	TemJ	Or-J-I	Japan	NA	NA	Hap_1	Yes
IRIS_313-10558	TemJ	Or-J-I	China	NA	NA	Hap_5	Yes
IRIS_313-10559	TemJ	Or-J-I	China	NA	NA	Hap_14	No
IRIS_313-10567	TemJ	Or-J-I	Japan	NA	NA	Hap_1	Yes
IRIS_313-10568	TemJ	Or-J-I	Japan	NA	NA	Hap_1	Yes
IRIS_313-10569	TemJ	Or-J-I	Japan	NA	NA	Hap_1	Yes
IRIS_313-10583	TemJ	Or-J-I	China	NA	NA	Hap_5	Yes
IRIS_313-10618	TemJ	Or-J-I	Portugal	NA	NA	Hap_1	Yes
IRIS_313-10631	TemJ	Or-J-I	Taiwan	NA	NA	Hap_1	Yes
IRIS_313-10642	TemJ	Or-J-I	Japan	NA	NA	Hap_1	Yes
IRIS_313-10677	TemJ	Or-J-I	Japan	NA	NA	Hap_1	Yes
IRIS_313-10967	TemJ	Or-J-I	Brazil	NA	NA	Hap_5	Yes
IRIS_313-11198	TemJ	Or-J-I	India	NA	NA	Hap_12	Yes
IRIS_313-11202	TemJ	Or-J-I	China	NA	NA	Hap_5	Yes
IRIS_313-11246	TemJ	Or-J-I	Japan	NA	NA	Hap_1	Yes
IRIS_313-11428	TemJ	Or-J-I	Brazil	NA	NA	Hap_5	Yes
IRIS_313-11498	TemJ	Or-J-I	Indonesia	NA	NA	Hap_5	Yes
IRIS_313-11570	TemJ	Or-J-I	China	NA	NA	Hap_1	Yes
IRIS_313-11574	TemJ	Or-J-I	China	NA	NA	Hap_13	Yes
IRIS_313-11582	TemJ	Or-J-I	China	NA	NA	Hap_13	Yes
IRIS_313-11651	TemJ	Or-J-I	China	NA	NA	Hap_1	Yes
IRIS_313-11653	TemJ	Or-J-I	China	NA	NA	Hap_5	Yes
IRIS_313-11800	TemJ	Or-J-I	China	NA	NA	Hap_1	Yes
IRIS_313-11981	TemJ	Or-J-I	Taiwan	NA	NA	Hap_1	Yes
IRIS_313-12003	TemJ	Or-J-I	Korea, Republic of	NA	NA	Hap_7	No
IRIS_313-12060	TemJ	Or-J-I	China	NA	NA	Hap_5	Yes
IRIS_313-12061	TemJ	Or-J-I	China	NA	NA	Hap_1	Yes
IRIS_313-8023	TemJ	Or-J-I	Italy	NA	NA	Hap_5	Yes
IRIS_313-8032	TemJ	Or-J-I	Italy	NA	NA	Hap_5	Yes
IRIS_313-8033	TemJ	Or-J-I	Italy	NA	NA	Hap_5	Yes
IRIS_313-8039	TemJ	Or-J-I	Italy	NA	NA	Hap_1	Yes
IRIS_313-8048	TemJ	Or-J-I	Italy	NA	NA	Hap_5	Yes
IRIS_313-8049	TemJ	Or-J-I	Italy	NA	NA	Hap_5	Yes
IRIS_313-8053	TemJ	Or-J-I	Italy	NA	NA	Hap_5	Yes
IRIS_313-8065	TemJ	Or-J-I	Italy	NA	NA	Hap_5	Yes
IRIS_313-8085	TemJ	Or-J-I	Spain	NA	NA	Hap_5	Yes
IRIS_313-8090	TemJ	Or-J-I	Spain	NA	NA	Hap_5	Yes
IRIS_313-8112	TemJ	Or-J-I	Bulgaria	NA	NA	Hap_12	Yes
IRIS_313-8114	TemJ	Or-J-I	Portugal	NA	NA	Hap_5	Yes
IRIS_313-8118	TemJ	Or-J-I	Portugal	NA	NA	Hap_5	Yes
IRIS_313-8119	TemJ	Or-J-I	Bulgaria	NA	NA	Hap_1	Yes
IRIS_313-8126	TemJ	Or-J-I	Bulgaria	NA	NA	Hap_1	Yes
IRIS_313-8129	TemJ	Or-J-I	Bulgaria	NA	NA	Hap_12	Yes
IRIS_313-8132	TemJ	Or-J-I	Portugal	NA	NA	Hap_1	Yes
IRIS_313-8136	TemJ	Or-J-I	Portugal	NA	NA	Hap_5	Yes
IRIS_313-8142	TemJ	Or-J-I	Portugal	NA	NA	Hap_1	Yes
IRIS_313-8149	TemJ	Or-J-I	Portugal	NA	NA	Hap_5	Yes
IRIS_313-8165	TemJ	Or-J-I	France	NA	NA	Hap_1	Yes
IRIS_313-8166	TemJ	Or-J-I	France	NA	NA	Hap_5	Yes
IRIS_313-8171	TemJ	Or-J-I	Hungary	NA	NA	Hap_5	Yes
IRIS_313-8177	TemJ	Or-J-I	Italy	NA	NA	Hap_1	Yes
IRIS_313-8195	TemJ	Or-J-I	Italy	NA	NA	Hap_5	Yes
IRIS_313-8200	TemJ	Or-J-I	Italy	NA	NA	Hap_5	Yes
IRIS_313-8208	TemJ	Or-J-I	Portugal	NA	NA	Hap_1	Yes
IRIS_313-8214	TemJ	Or-J-I	Greece	NA	NA	Hap_1	Yes
IRIS_313-8302	TemJ	Or-J-I	Bhutan	NA	NA	Hap_29	No
IRIS_313-8356	TemJ	Or-J-I	Philippines	NA	NA	Hap_19	Yes
IRIS_313-8399	TemJ	Or-J-I	France	NA	NA	Hap_1	Yes
IRIS_313-8627	TemJ	Or-J-I	United States of America	NA	NA	Hap_5	Yes
IRIS_313-8669	TemJ	Or-J-I	United States of America	NA	NA	Hap_6	No
IRIS_313-8755	TemJ	Or-J-I	Japan	NA	NA	Hap_1	Yes
IRIS_313-8856	TemJ	Or-J-I	United States of America	NA	NA	Hap_1	Yes
IRIS_313-9193	TemJ	Or-J-I	Brazil	NA	NA	Hap_5	Yes
IRIS_313-9197	TemJ	Or-J-I	India	NA	NA	Hap_5	Yes
IRIS_313-9228	TemJ	Or-J-I	Japan	NA	NA	Hap_1	Yes
IRIS_313-9346	TemJ	Or-J-I	Taiwan	NA	NA	Hap_1	Yes
IRIS_313-9379	TemJ	Or-J-I	Korea, Republic of	NA	NA	Hap_10	Yes
IRIS_313-9463	TemJ	Or-J-I	United States of America	NA	NA	Hap_1	Yes
IRIS_313-9468	TemJ	Or-J-I	China	NA	NA	Hap_1	Yes
IRIS_313-9698	TemJ	Or-J-I	Democratic People's Republic of Korea	NA	NA	Hap_2	No
IRIS_313-9702	TemJ	Or-J-I	Taiwan	NA	NA	Hap_1	Yes
IRIS_313-9703	TemJ	Or-J-I	Taiwan	NA	NA	Hap_9	No
IRIS_313-9724	TemJ	Or-J-I	China	NA	NA	Hap_13	Yes
IRIS_313-9725	TemJ	Or-J-I	China	NA	NA	Hap_5	Yes
IRIS_313-9770	TemJ	Or-J-I	Italy	NA	NA	Hap_5	Yes
IRIS_313-9782	TemJ	Or-J-I	Peru	NA	NA	Hap_1	Yes
IRIS_313-9790	TemJ	Or-J-I	Uruguay	NA	NA	Hap_1	Yes
IRIS_313-9813	TemJ	Or-J-I	Hungary	NA	NA	Hap_12	Yes
IRIS_313-9838	TemJ	Or-J-I	New Zealand	NA	NA	Hap_1	Yes
IRIS_313-9964	TemJ	Or-J-I	Georgia	NA	NA	Hap_18	No
CX111	TroJ	Or-J-I	Egypt	NA	NA	Hap_5	Yes
CX269	TroJ	Or-J-I	Brazil	NA	NA	Hap_5	Yes
CX374	TroJ	Or-J-I	Cote d'Ivoire	NA	NA	Hap_5	Yes
IRIS_313-10096	TroJ	Or-J-I	Korea, Republic of	NA	NA	Hap_10	Yes
IRIS_313-10176	TroJ	Or-J-I	Thailand	NA	NA	Hap_4	Yes
IRIS_313-10228	TroJ	Or-J-I	China	NA	NA	Hap_5	Yes
IRIS_313-10373	TroJ	Or-J-I	Philippines	NA	NA	Hap_1	Yes
IRIS_313-10541	TroJ	Or-J-I	Guinea-Bissau	NA	NA	Hap_5	Yes
IRIS_313-10619	TroJ	Or-J-I	Brazil	NA	NA	Hap_5	Yes
IRIS_313-10758	TroJ	Or-J-I	Indonesia	NA	NA	Hap_5	Yes
IRIS_313-10776	TroJ	Or-J-I	Indonesia	NA	NA	Hap_26	No
IRIS_313-10794	TroJ	Or-J-I	Indonesia	NA	NA	Hap_25	No
IRIS_313-10848	TroJ	Or-J-I	India	NA	NA	Hap_5	Yes
IRIS_313-10865	TroJ	Or-J-I	India	NA	NA	Hap_4	Yes
IRIS_313-10867	TroJ	Or-J-I	India	NA	NA	Hap_4	Yes
IRIS_313-10888	TroJ	Or-J-I	India	NA	NA	Hap_8	No
IRIS_313-10945	TroJ	Or-J-I	Indonesia	NA	NA	Hap_5	Yes
IRIS_313-10949	TroJ	Or-J-I	Indonesia	NA	NA	Hap_5	Yes
IRIS_313-10952	TroJ	Or-J-I	Indonesia	NA	NA	Hap_5	Yes
IRIS_313-10957	TroJ	Or-J-I	Indonesia	NA	NA	Hap_5	Yes
IRIS_313-10960	TroJ	Or-J-I	Indonesia	NA	NA	Hap_26	No
IRIS_313-11001	TroJ	Or-J-I	Indonesia	NA	NA	Hap_5	Yes
IRIS_313-11009	TroJ	Or-J-I	Indonesia	NA	NA	Hap_5	Yes
IRIS_313-11121	TroJ	Or-J-I	Liberia	NA	NA	Hap_5	Yes
IRIS_313-11156	TroJ	Or-J-I	India	NA	NA	Hap_1	Yes
IRIS_313-11183	TroJ	Or-J-I	Indonesia	NA	NA	Hap_5	Yes
IRIS_313-11238	TroJ	Or-J-I	Brazil	NA	NA	Hap_5	Yes
IRIS_313-11328	TroJ	Or-J-I	Malaysia	NA	NA	Hap_5	Yes
IRIS_313-11396	TroJ	Or-J-I	Indonesia	NA	NA	Hap_5	Yes
IRIS_313-11397	TroJ	Or-J-I	Indonesia	NA	NA	Hap_5	Yes
IRIS_313-11427	TroJ	Or-J-I	Brazil	NA	NA	Hap_5	Yes
IRIS_313-11434	TroJ	Or-J-I	Colombia	NA	NA	Hap_23	No
IRIS_313-11536	TroJ	Or-J-I	Georgia	NA	NA	Hap_12	Yes
IRIS_313-11672	TroJ	Or-J-I	Nepal	NA	NA	Hap_1	Yes
IRIS_313-11906	TroJ	Or-J-I	Indonesia	NA	NA	Hap_5	Yes
IRIS_313-11994	TroJ	Or-J-I	Philippines	NA	NA	Hap_24	No
IRIS_313-12006	TroJ	Or-J-I	Malaysia	NA	NA	Hap_5	Yes
IRIS_313-12069	TroJ	Or-J-I	Indonesia	NA	NA	Hap_5	Yes
IRIS_313-12164	TroJ	Or-J-I	Cambodia	NA	NA	Hap_27	No
IRIS_313-12271	TroJ	Or-J-I	Philippines	NA	NA	Hap_5	Yes
IRIS_313-12279	TroJ	Or-J-I	Madagascar	NA	NA	Hap_20	No
IRIS_313-12289	TroJ	Or-J-I	Myanmar	NA	NA	Hap_16	No
IRIS_313-12321	TroJ	Or-J-I	Lao People's Democratic Republic	NA	NA	Hap_5	Yes
IRIS_313-7646	TroJ	Or-J-I	Madagascar	NA	NA	Hap_5	Yes
IRIS_313-7883	TroJ	Or-J-I	Indonesia	NA	NA	Hap_5	Yes
IRIS_313-7933	TroJ	Or-J-I	Nepal	NA	NA	Hap_11	No
IRIS_313-7992	TroJ	Or-J-I	Madagascar	NA	NA	Hap_5	Yes
IRIS_313-8031	TroJ	Or-J-I	Italy	NA	NA	Hap_5	Yes
IRIS_313-8052	TroJ	Or-J-I	Italy	NA	NA	Hap_5	Yes
IRIS_313-8084	TroJ	Or-J-I	Spain	NA	NA	Hap_1	Yes
IRIS_313-8095	TroJ	Or-J-I	Spain	NA	NA	Hap_5	Yes
IRIS_313-8109	TroJ	Or-J-I	Portugal	NA	NA	Hap_5	Yes
IRIS_313-8155	TroJ	Or-J-I	Russia	NA	NA	Hap_1	Yes
IRIS_313-8213	TroJ	Or-J-I	France	NA	NA	Hap_5	Yes
IRIS_313-8324	TroJ	Or-J-I	Indonesia	NA	NA	Hap_5	Yes
IRIS_313-8387	TroJ	Or-J-I	China	NA	NA	Hap_5	Yes
IRIS_313-8434	TroJ	Or-J-I	United States of America	NA	NA	Hap_5	Yes
IRIS_313-8687	TroJ	Or-J-I	Guinea-Bissau	NA	NA	Hap_5	Yes
IRIS_313-8690	TroJ	Or-J-I	Viet Nam	NA	NA	Hap_5	Yes
IRIS_313-8778	TroJ	Or-J-I	United States of America	NA	NA	Hap_5	Yes
IRIS_313-8876	TroJ	Or-J-I	France	NA	NA	Hap_5	Yes
IRIS_313-8894	TroJ	Or-J-I	Malaysia	NA	NA	Hap_5	Yes
IRIS_313-8911	TroJ	Or-J-I	Thailand	NA	NA	Hap_5	Yes
IRIS_313-8955	TroJ	Or-J-I	Malaysia	NA	NA	Hap_21	No
IRIS_313-9081	TroJ	Or-J-I	Japan	NA	NA	Hap_1	Yes
IRIS_313-9176	TroJ	Or-J-I	India	NA	NA	Hap_6	No
IRIS_313-9187	TroJ	Or-J-I	Malaysia	NA	NA	Hap_5	Yes
IRIS_313-9242	TroJ	Or-J-I	Indonesia	NA	NA	Hap_5	Yes
IRIS_313-9267	TroJ	Or-J-I	Venezuela	NA	NA	Hap_5	Yes
IRIS_313-9301	TroJ	Or-J-I	Indonesia	NA	NA	Hap_5	Yes
IRIS_313-9366	TroJ	Or-J-I	United States of America	NA	NA	Hap_5	Yes
IRIS_313-9405	TroJ	Or-J-I	Indonesia	NA	NA	Hap_5	Yes
IRIS_313-9519	TroJ	Or-J-I	Surinam	NA	NA	Hap_5	Yes
IRIS_313-9529	TroJ	Or-J-I	Bhutan	NA	NA	Hap_5	Yes
IRIS_313-9539	TroJ	Or-J-I	United States of America	NA	NA	Hap_5	Yes
IRIS_313-9811	TroJ	Or-J-I	Hungary	NA	NA	Hap_12	Yes
IRIS_313-9817	TroJ	Or-J-I	Netherlands	NA	NA	Hap_5	Yes
IRIS_313-9851	TroJ	Or-J-I	Surinam	NA	NA	Hap_5	Yes
IRIS_313-9880	TroJ	Or-J-I	Hungary	NA	NA	Hap_12	Yes
IRIS_313-9928	TroJ	Or-J-I	Philippines	NA	NA	Hap_5	Yes
CX110	Aro	Or-J-II	Japan	NA	NA	Hap_59	No
IRIS_313-10258	Aro	Or-J-II	Chile	NA	NA	Hap_32	Yes
IRIS_313-8747	Aro	Or-J-II	Iran	NA	NA	Hap_59	No
IRIS_313-8923	Aro	Or-J-II	United States of America	NA	NA	Hap_32	Yes
IRIS_313-9558	Aro	Or-J-II	Malaysia	NA	NA	Hap_62	Yes
IRIS_313-9939	Aro	Or-J-II	Surinam	NA	NA	Hap_32	Yes
IRIS_313-10673	Aus	Or-J-II	India	NA	NA	Hap_32	Yes
IRIS_313-10869	Aus	Or-J-II	India	NA	NA	Hap_57	No
IRIS_313-10873	Aus	Or-J-II	India	NA	NA	Hap_45	No
IRIS_313-10878	Aus	Or-J-II	India	NA	NA	Hap_57	No
IRIS_313-11055	Aus	Or-J-II	Bangladesh	NA	NA	Hap_56	No
IRIS_313-11154	Aus	Or-J-II	Bangladesh	NA	NA	Hap_58	No
IRIS_313-11473	Aus	Or-J-II	Philippines	NA	NA	Hap_42	Yes
IRIS_313-11617	Aus	Or-J-II	India	NA	NA	Hap_32	Yes
IRIS_313-12141	Aus	Or-J-II	Bangladesh	NA	NA	Hap_55	No
IRIS_313-8789	Aus	Or-J-II	Bangladesh	NA	NA	Hap_32	Yes
B007	Ind	Or-J-II	Viet Nam	NA	NA	Hap_32	Yes
CX107	Ind	Or-J-II	Viet Nam	NA	NA	Hap_32	Yes
CX150	Ind	Or-J-II	Philippines	NA	NA	Hap_32	Yes
CX226	Ind	Or-J-II	Philippines	NA	NA	Hap_46	No
CX247	Ind	Or-J-II	Ghana	NA	NA	Hap_32	Yes
CX363	Ind	Or-J-II	_no_info	NA	NA	Hap_61	No
CX83	Ind	Or-J-II	Viet Nam	NA	NA	Hap_32	Yes
CX93	Ind	Or-J-II	India	NA	NA	Hap_60	No
CX99	Ind	Or-J-II	India	NA	NA	Hap_48	No
IRIS_313-10034	Ind	Or-J-II	Niger	NA	NA	Hap_32	Yes
IRIS_313-10041	Ind	Or-J-II	Madagascar	NA	NA	Hap_32	Yes
IRIS_313-10177	Ind	Or-J-II	China	NA	NA	Hap_32	Yes
IRIS_313-10179	Ind	Or-J-II	China	NA	NA	Hap_32	Yes
IRIS_313-10196	Ind	Or-J-II	China	NA	NA	Hap_32	Yes
IRIS_313-10318	Ind	Or-J-II	Guyana	NA	NA	Hap_32	Yes
IRIS_313-10557	Ind	Or-J-II	Cambodia	NA	NA	Hap_32	Yes
IRIS_313-10654	Ind	Or-J-II	Lao People's Democratic Republic	NA	NA	Hap_32	Yes
IRIS_313-10749	Ind	Or-J-II	Viet Nam	NA	NA	Hap_32	Yes
IRIS_313-10887	Ind	Or-J-II	India	NA	NA	Hap_54	No
IRIS_313-10901	Ind	Or-J-II	Cambodia	NA	NA	Hap_32	Yes
IRIS_313-10908	Ind	Or-J-II	Cambodia	NA	NA	Hap_32	Yes
IRIS_313-10913	Ind	Or-J-II	Cambodia	NA	NA	Hap_32	Yes
IRIS_313-11040	Ind	Or-J-II	India	NA	NA	Hap_60	No
IRIS_313-11072	Ind	Or-J-II	Lao People's Democratic Republic	NA	NA	Hap_50	No
IRIS_313-11088	Ind	Or-J-II	Cambodia	NA	NA	Hap_50	No
IRIS_313-11096	Ind	Or-J-II	Viet Nam	NA	NA	Hap_32	Yes
IRIS_313-11139	Ind	Or-J-II	Myanmar	NA	NA	Hap_32	Yes
IRIS_313-11208	Ind	Or-J-II	Bangladesh	NA	NA	Hap_32	Yes
IRIS_313-11226	Ind	Or-J-II	Bangladesh	NA	NA	Hap_32	Yes
IRIS_313-11230	Ind	Or-J-II	Bangladesh	NA	NA	Hap_32	Yes
IRIS_313-11242	Ind	Or-J-II	India	NA	NA	Hap_32	Yes
IRIS_313-11304	Ind	Or-J-II	India	NA	NA	Hap_54	No
IRIS_313-11325	Ind	Or-J-II	Philippines	NA	NA	Hap_32	Yes
IRIS_313-11344	Ind	Or-J-II	Philippines	NA	NA	Hap_32	Yes
IRIS_313-11351	Ind	Or-J-II	India	NA	NA	Hap_32	Yes
IRIS_313-11368	Ind	Or-J-II	India	NA	NA	Hap_32	Yes
IRIS_313-11381	Ind	Or-J-II	Philippines	NA	NA	Hap_32	Yes
IRIS_313-11382	Ind	Or-J-II	Sri Lanka	NA	NA	Hap_32	Yes
IRIS_313-11399	Ind	Or-J-II	Bangladesh	NA	NA	Hap_32	Yes
IRIS_313-11448	Ind	Or-J-II	India	NA	NA	Hap_32	Yes
IRIS_313-11524	Ind	Or-J-II	Cote d'Ivoire	NA	NA	Hap_32	Yes
IRIS_313-11599	Ind	Or-J-II	India	NA	NA	Hap_49	No
IRIS_313-11623	Ind	Or-J-II	China	NA	NA	Hap_32	Yes
IRIS_313-11683	Ind	Or-J-II	Thailand	NA	NA	Hap_32	Yes
IRIS_313-11757	Ind	Or-J-II	Madagascar	NA	NA	Hap_32	Yes
IRIS_313-11832	Ind	Or-J-II	Thailand	NA	NA	Hap_32	Yes
IRIS_313-11843	Ind	Or-J-II	Thailand	NA	NA	Hap_32	Yes
IRIS_313-11935	Ind	Or-J-II	Cambodia	NA	NA	Hap_32	Yes
IRIS_313-11936	Ind	Or-J-II	Cambodia	NA	NA	Hap_32	Yes
IRIS_313-11977	Ind	Or-J-II	Madagascar	NA	NA	Hap_32	Yes
IRIS_313-11979	Ind	Or-J-II	Philippines	NA	NA	Hap_46	No
IRIS_313-11983	Ind	Or-J-II	Burkina Faso	NA	NA	Hap_32	Yes
IRIS_313-11999	Ind	Or-J-II	Cambodia	NA	NA	Hap_32	Yes
IRIS_313-12102	Ind	Or-J-II	Cambodia	NA	NA	Hap_32	Yes
IRIS_313-12268	Ind	Or-J-II	Myanmar	NA	NA	Hap_54	No
IRIS_313-7681	Ind	Or-J-II	Mali	NA	NA	Hap_32	Yes
IRIS_313-8063	Ind	Or-J-II	Argentina	NA	NA	Hap_32	Yes
IRIS_313-8162	Ind	Or-J-II	China	NA	NA	Hap_32	Yes
IRIS_313-8185	Ind	Or-J-II	Italy	NA	NA	Hap_32	Yes
IRIS_313-8412	Ind	Or-J-II	China	NA	NA	Hap_32	Yes
IRIS_313-8414	Ind	Or-J-II	India	NA	NA	Hap_32	Yes
IRIS_313-8567	Ind	Or-J-II	Philippines	NA	NA	Hap_32	Yes
IRIS_313-8621	Ind	Or-J-II	India	NA	NA	Hap_32	Yes
IRIS_313-8811	Ind	Or-J-II	Malaysia	NA	NA	Hap_61	No
IRIS_313-8844	Ind	Or-J-II	India	NA	NA	Hap_32	Yes
IRIS_313-8920	Ind	Or-J-II	India	NA	NA	Hap_49	No
IRIS_313-8935	Ind	Or-J-II	India	NA	NA	Hap_32	Yes
IRIS_313-9397	Ind	Or-J-II	Bangladesh	NA	NA	Hap_32	Yes
IRIS_313-9606	Ind	Or-J-II	Bangladesh	NA	NA	Hap_32	Yes
IRIS_313-9634	Ind	Or-J-II	India	NA	NA	Hap_33	Yes
IRIS_313-9637	Ind	Or-J-II	Viet Nam	NA	NA	Hap_32	Yes
IRIS_313-9767	Ind	Or-J-II	United States of America	NA	NA	Hap_32	Yes
IRIS_313-9936	Ind	Or-J-II	Sri Lanka	NA	NA	Hap_32	Yes
CX242	Inter	Or-J-II	Philippines	NA	NA	Hap_32	Yes
IRIS_313-10444	Inter	Or-J-II	Central America	NA	NA	Hap_32	Yes
IRIS_313-11189	Inter	Or-J-II	Union of Soviet Socialist Republics (Former)	NA	NA	Hap_59	No
IRIS_313-9392	Inter	Or-J-II	India	NA	NA	Hap_32	Yes
IRIS_313-9404	Inter	Or-J-II	Bhutan	NA	NA	Hap_32	Yes
CX243	Jap	Or-J-II	Philippines	NA	NA	Hap_32	Yes
CX262	Jap	Or-J-II	Brazil	NA	NA	Hap_32	Yes
CX285	Jap	Or-J-II	China	NA	NA	Hap_32	Yes
CX32	Jap	Or-J-II	Myanmar	NA	NA	Hap_32	Yes
IRIS_313-10062	Jap	Or-J-II	Greece	NA	NA	Hap_32	Yes
IRIS_313-10065	Jap	Or-J-II	Korea, Republic of	NA	NA	Hap_32	Yes
IRIS_313-10067	Jap	Or-J-II	Korea, Republic of	NA	NA	Hap_32	Yes
IRIS_313-10071	Jap	Or-J-II	Japan	NA	NA	Hap_32	Yes
IRIS_313-10076	Jap	Or-J-II	Japan	NA	NA	Hap_32	Yes
IRIS_313-10078	Jap	Or-J-II	Japan	NA	NA	Hap_32	Yes
IRIS_313-10080	Jap	Or-J-II	Japan	NA	NA	Hap_32	Yes
IRIS_313-10082	Jap	Or-J-II	Japan	NA	NA	Hap_32	Yes
IRIS_313-10872	Jap	Or-J-II	India	NA	NA	Hap_51	No
IRIS_313-11495	Jap	Or-J-II	Indonesia	NA	NA	Hap_44	No
IRIS_313-7914	Jap	Or-J-II	Cote d'Ivoire	NA	NA	Hap_32	Yes
IRIS_313-7924	Jap	Or-J-II	Bolivia	NA	NA	Hap_32	Yes
IRIS_313-8064	Jap	Or-J-II	Argentina	NA	NA	Hap_32	Yes
IRIS_313-8160	Jap	Or-J-II	Colombia	NA	NA	Hap_32	Yes
IRIS_313-8193	Jap	Or-J-II	United States of America	NA	NA	Hap_32	Yes
IRIS_313-8323	Jap	Or-J-II	United States of America	NA	NA	Hap_32	Yes
IRIS_313-9375	Jap	Or-J-II	Malaysia	NA	NA	Hap_63	No
IRIS_313-9523	Jap	Or-J-II	Japan	NA	NA	Hap_101	Yes
IRIS_313-9818	Jap	Or-J-II	Mexico	NA	NA	Hap_32	Yes
W3055	OR	Or-J-II	China	NA	NA	Hap_38	No
W3054	OR	Or-J-II	China	NA	NA	Hap_38	No
W3053	OR	Or-J-II	China	NA	NA	Hap_38	No
W3050	OR	Or-J-II	China	NA	NA	Hap_32	Yes
W2332	OR	Or-J-II	Vietnam	NA	NA	Hap_32	Yes
W2331	OR	Or-J-II	Vietnam	NA	NA	Hap_32	Yes
W2319	OR	Or-J-II	Vietnam	NA	NA	Hap_32	Yes
W2316	OR	Or-J-II	Vietnam	NA	NA	Hap_32	Yes
W1718	OR	Or-J-II	China	NA	NA	Hap_47	No
W0179	OR	Or-J-II	Thailand	NA	NA	Hap_32	Yes
W0178	OR	Or-J-II	Thailand	NA	NA	Hap_32	Yes
B002	TemJ	Or-J-II	China	NA	NA	Hap_32	Yes
B205	TemJ	Or-J-II	China	NA	NA	Hap_33	Yes
B218	TemJ	Or-J-II	China	NA	NA	Hap_32	Yes
IRIS_313-10094	TemJ	Or-J-II	Korea, Republic of	NA	NA	Hap_32	Yes
IRIS_313-10570	TemJ	Or-J-II	Japan	NA	NA	Hap_32	Yes
IRIS_313-10837	TemJ	Or-J-II	Korea, Republic of	NA	NA	Hap_101	Yes
IRIS_313-10840	TemJ	Or-J-II	Korea, Republic of	NA	NA	Hap_101	Yes
IRIS_313-10916	TemJ	Or-J-II	Cambodia	NA	NA	Hap_42	Yes
IRIS_313-11201	TemJ	Or-J-II	China	NA	NA	Hap_32	Yes
IRIS_313-11660	TemJ	Or-J-II	Liberia	NA	NA	Hap_32	Yes
IRIS_313-11931	TemJ	Or-J-II	China	NA	NA	Hap_32	Yes
IRIS_313-8044	TemJ	Or-J-II	Italy	NA	NA	Hap_32	Yes
IRIS_313-8074	TemJ	Or-J-II	Australia	NA	NA	Hap_32	Yes
IRIS_313-8076	TemJ	Or-J-II	Australia	NA	NA	Hap_32	Yes
IRIS_313-8087	TemJ	Or-J-II	Spain	NA	NA	Hap_32	Yes
IRIS_313-8102	TemJ	Or-J-II	United States of America	NA	NA	Hap_32	Yes
IRIS_313-8127	TemJ	Or-J-II	Bulgaria	NA	NA	Hap_101	Yes
IRIS_313-8158	TemJ	Or-J-II	Colombia	NA	NA	Hap_32	Yes
IRIS_313-8159	TemJ	Or-J-II	Colombia	NA	NA	Hap_32	Yes
IRIS_313-8173	TemJ	Or-J-II	United States of America	NA	NA	Hap_32	Yes
IRIS_313-8180	TemJ	Or-J-II	United States of America	NA	NA	Hap_32	Yes
IRIS_313-8183	TemJ	Or-J-II	United States of America	NA	NA	Hap_32	Yes
IRIS_313-8186	TemJ	Or-J-II	United States of America	NA	NA	Hap_32	Yes
IRIS_313-8205	TemJ	Or-J-II	Italy	NA	NA	Hap_32	Yes
IRIS_313-8209	TemJ	Or-J-II	Greece	NA	NA	Hap_32	Yes
IRIS_313-8594	TemJ	Or-J-II	Philippines	NA	NA	Hap_32	Yes
IRIS_313-9002	TemJ	Or-J-II	Japan	NA	NA	Hap_32	Yes
IRIS_313-9048	TemJ	Or-J-II	Bhutan	NA	NA	Hap_32	Yes
IRIS_313-9769	TemJ	Or-J-II	Japan	NA	NA	Hap_32	Yes
IRIS_313-9884	TemJ	Or-J-II	Japan	NA	NA	Hap_101	Yes
IRIS_313-9890	TemJ	Or-J-II	Korea, Republic of	NA	NA	Hap_101	Yes
IRIS_313-9974	TemJ	Or-J-II	Korea, Republic of	NA	NA	Hap_101	Yes
B018	TroJ	Or-J-II	United States of America	NA	NA	Hap_32	Yes
B043	TroJ	Or-J-II	Australia	NA	NA	Hap_32	Yes
B053	TroJ	Or-J-II	Australia	NA	NA	Hap_32	Yes
B191	TroJ	Or-J-II	Australia	NA	NA	Hap_32	Yes
B241	TroJ	Or-J-II	China	NA	NA	Hap_32	Yes
B245	TroJ	Or-J-II	China	NA	NA	Hap_52	No
CX151	TroJ	Or-J-II	Philippines	NA	NA	Hap_32	Yes
CX359	TroJ	Or-J-II	China	NA	NA	Hap_32	Yes
IRIS_313-10099	TroJ	Or-J-II	Madagascar	NA	NA	Hap_32	Yes
IRIS_313-10485	TroJ	Or-J-II	Philippines	NA	NA	Hap_32	Yes
IRIS_313-10489	TroJ	Or-J-II	Philippines	NA	NA	Hap_62	Yes
IRIS_313-10578	TroJ	Or-J-II	Philippines	NA	NA	Hap_32	Yes
IRIS_313-10582	TroJ	Or-J-II	Philippines	NA	NA	Hap_42	Yes
IRIS_313-10620	TroJ	Or-J-II	Brazil	NA	NA	Hap_41	Yes
IRIS_313-10645	TroJ	Or-J-II	Philippines	NA	NA	Hap_42	Yes
IRIS_313-10656	TroJ	Or-J-II	Lao People's Democratic Republic	NA	NA	Hap_32	Yes
IRIS_313-10660	TroJ	Or-J-II	Lao People's Democratic Republic	NA	NA	Hap_32	Yes
IRIS_313-10704	TroJ	Or-J-II	Malaysia	NA	NA	Hap_32	Yes
IRIS_313-10708	TroJ	Or-J-II	United States of America	NA	NA	Hap_32	Yes
IRIS_313-10712	TroJ	Or-J-II	Cote d'Ivoire	NA	NA	Hap_32	Yes
IRIS_313-10730	TroJ	Or-J-II	Cote d'Ivoire	NA	NA	Hap_32	Yes
IRIS_313-10743	TroJ	Or-J-II	Indonesia	NA	NA	Hap_32	Yes
IRIS_313-10752	TroJ	Or-J-II	United States of America	NA	NA	Hap_32	Yes
IRIS_313-10798	TroJ	Or-J-II	Indonesia	NA	NA	Hap_42	Yes
IRIS_313-10829	TroJ	Or-J-II	Philippines	NA	NA	Hap_32	Yes
IRIS_313-10874	TroJ	Or-J-II	India	NA	NA	Hap_45	No
IRIS_313-10884	TroJ	Or-J-II	India	NA	NA	Hap_33	Yes
IRIS_313-10893	TroJ	Or-J-II	India	NA	NA	Hap_33	Yes
IRIS_313-10923	TroJ	Or-J-II	Thailand	NA	NA	Hap_32	Yes
IRIS_313-10991	TroJ	Or-J-II	Philippines	NA	NA	Hap_32	Yes
IRIS_313-10993	TroJ	Or-J-II	Philippines	NA	NA	Hap_42	Yes
IRIS_313-11045	TroJ	Or-J-II	Malaysia	NA	NA	Hap_62	Yes
IRIS_313-11073	TroJ	Or-J-II	Lao People's Democratic Republic	NA	NA	Hap_34	No
IRIS_313-11077	TroJ	Or-J-II	Lao People's Democratic Republic	NA	NA	Hap_33	Yes
IRIS_313-11103	TroJ	Or-J-II	Liberia	NA	NA	Hap_32	Yes
IRIS_313-11105	TroJ	Or-J-II	Liberia	NA	NA	Hap_32	Yes
IRIS_313-11109	TroJ	Or-J-II	Liberia	NA	NA	Hap_32	Yes
IRIS_313-11159	TroJ	Or-J-II	Cote d'Ivoire	NA	NA	Hap_32	Yes
IRIS_313-11161	TroJ	Or-J-II	Liberia	NA	NA	Hap_32	Yes
IRIS_313-11195	TroJ	Or-J-II	Myanmar	NA	NA	Hap_32	Yes
IRIS_313-11248	TroJ	Or-J-II	Thailand	NA	NA	Hap_62	Yes
IRIS_313-11314	TroJ	Or-J-II	Indonesia	NA	NA	Hap_62	Yes
IRIS_313-11329	TroJ	Or-J-II	Malaysia	NA	NA	Hap_62	Yes
IRIS_313-11376	TroJ	Or-J-II	Cote d'Ivoire	NA	NA	Hap_32	Yes
IRIS_313-11379	TroJ	Or-J-II	Philippines	NA	NA	Hap_62	Yes
IRIS_313-11426	TroJ	Or-J-II	Brazil	NA	NA	Hap_41	Yes
IRIS_313-11433	TroJ	Or-J-II	India	NA	NA	Hap_32	Yes
IRIS_313-11494	TroJ	Or-J-II	India	NA	NA	Hap_33	Yes
IRIS_313-11525	TroJ	Or-J-II	Guinea-Bissau	NA	NA	Hap_32	Yes
IRIS_313-11526	TroJ	Or-J-II	Cote d'Ivoire	NA	NA	Hap_32	Yes
IRIS_313-11658	TroJ	Or-J-II	Sierra Leone	NA	NA	Hap_32	Yes
IRIS_313-11690	TroJ	Or-J-II	Bhutan	NA	NA	Hap_32	Yes
IRIS_313-11845	TroJ	Or-J-II	Thailand	NA	NA	Hap_32	Yes
IRIS_313-11892	TroJ	Or-J-II	Thailand	NA	NA	Hap_32	Yes
IRIS_313-11897	TroJ	Or-J-II	Thailand	NA	NA	Hap_39	No
IRIS_313-11913	TroJ	Or-J-II	Philippines	NA	NA	Hap_62	Yes
IRIS_313-11915	TroJ	Or-J-II	Ghana	NA	NA	Hap_32	Yes
IRIS_313-11922	TroJ	Or-J-II	Thailand	NA	NA	Hap_34	No
IRIS_313-11924	TroJ	Or-J-II	Thailand	NA	NA	Hap_32	Yes
IRIS_313-11926	TroJ	Or-J-II	Thailand	NA	NA	Hap_33	Yes
IRIS_313-11946	TroJ	Or-J-II	Burkina Faso	NA	NA	Hap_32	Yes
IRIS_313-11970	TroJ	Or-J-II	Indonesia	NA	NA	Hap_62	Yes
IRIS_313-12018	TroJ	Or-J-II	Sierra Leone	NA	NA	Hap_32	Yes
IRIS_313-12021	TroJ	Or-J-II	Nigeria	NA	NA	Hap_32	Yes
IRIS_313-12029	TroJ	Or-J-II	Lao People's Democratic Republic	NA	NA	Hap_37	No
IRIS_313-12031	TroJ	Or-J-II	Philippines	NA	NA	Hap_42	Yes
IRIS_313-12045	TroJ	Or-J-II	Indonesia	NA	NA	Hap_32	Yes
IRIS_313-12063	TroJ	Or-J-II	Lao People's Democratic Republic	NA	NA	Hap_35	No
IRIS_313-12071	TroJ	Or-J-II	Lao People's Democratic Republic	NA	NA	Hap_32	Yes
IRIS_313-12076	TroJ	Or-J-II	Lao People's Democratic Republic	NA	NA	Hap_53	No
IRIS_313-12129	TroJ	Or-J-II	Lao People's Democratic Republic	NA	NA	Hap_32	Yes
IRIS_313-12144	TroJ	Or-J-II	Philippines	NA	NA	Hap_32	Yes
IRIS_313-12228	TroJ	Or-J-II	Lao People's Democratic Republic	NA	NA	Hap_32	Yes
IRIS_313-12252	TroJ	Or-J-II	Lao People's Democratic Republic	NA	NA	Hap_32	Yes
IRIS_313-12254	TroJ	Or-J-II	Lao People's Democratic Republic	NA	NA	Hap_33	Yes
IRIS_313-12258	TroJ	Or-J-II	Lao People's Democratic Republic	NA	NA	Hap_33	Yes
IRIS_313-12265	TroJ	Or-J-II	Lao People's Democratic Republic	NA	NA	Hap_32	Yes
IRIS_313-12266	TroJ	Or-J-II	Myanmar	NA	NA	Hap_32	Yes
IRIS_313-12285	TroJ	Or-J-II	Malaysia	NA	NA	Hap_62	Yes
IRIS_313-12299	TroJ	Or-J-II	Lao People's Democratic Republic	NA	NA	Hap_32	Yes
IRIS_313-12324	TroJ	Or-J-II	Lao People's Democratic Republic	NA	NA	Hap_33	Yes
IRIS_313-12336	TroJ	Or-J-II	Lao People's Democratic Republic	NA	NA	Hap_32	Yes
IRIS_313-12337	TroJ	Or-J-II	Lao People's Democratic Republic	NA	NA	Hap_32	Yes
IRIS_313-12341	TroJ	Or-J-II	Lao People's Democratic Republic	NA	NA	Hap_33	Yes
IRIS_313-12345	TroJ	Or-J-II	Lao People's Democratic Republic	NA	NA	Hap_32	Yes
IRIS_313-12347	TroJ	Or-J-II	Lao People's Democratic Republic	NA	NA	Hap_36	No
IRIS_313-12350	TroJ	Or-J-II	Lao People's Democratic Republic	NA	NA	Hap_32	Yes
IRIS_313-12352	TroJ	Or-J-II	Lao People's Democratic Republic	NA	NA	Hap_32	Yes
IRIS_313-15905	TroJ	Or-J-II	Cote d'Ivoire	NA	NA	Hap_32	Yes
IRIS_313-15907	TroJ	Or-J-II	Uruguay	NA	NA	Hap_32	Yes
IRIS_313-7838	TroJ	Or-J-II	Senegal	NA	NA	Hap_32	Yes
IRIS_313-7856	TroJ	Or-J-II	Thailand	NA	NA	Hap_37	No
IRIS_313-7859	TroJ	Or-J-II	Cote d'Ivoire	NA	NA	Hap_32	Yes
IRIS_313-7866	TroJ	Or-J-II	Colombia	NA	NA	Hap_62	Yes
IRIS_313-7868	TroJ	Or-J-II	Colombia	NA	NA	Hap_41	Yes
IRIS_313-7885	TroJ	Or-J-II	Indonesia	NA	NA	Hap_32	Yes
IRIS_313-7902	TroJ	Or-J-II	Philippines	NA	NA	Hap_32	Yes
IRIS_313-7922	TroJ	Or-J-II	French Guiana	NA	NA	Hap_32	Yes
IRIS_313-8010	TroJ	Or-J-II	Philippines	NA	NA	Hap_32	Yes
IRIS_313-8072	TroJ	Or-J-II	United States of America	NA	NA	Hap_32	Yes
IRIS_313-8279	TroJ	Or-J-II	Malaysia	NA	NA	Hap_43	No
IRIS_313-8400	TroJ	Or-J-II	Japan	NA	NA	Hap_32	Yes
IRIS_313-8572	TroJ	Or-J-II	Philippines	NA	NA	Hap_42	Yes
IRIS_313-8578	TroJ	Or-J-II	Viet Nam	NA	NA	Hap_32	Yes
IRIS_313-8599	TroJ	Or-J-II	Thailand	NA	NA	Hap_40	No
IRIS_313-8694	TroJ	Or-J-II	Brazil	NA	NA	Hap_41	Yes
IRIS_313-8769	TroJ	Or-J-II	Guinea	NA	NA	Hap_32	Yes
IRIS_313-8815	TroJ	Or-J-II	Bhutan	NA	NA	Hap_32	Yes
IRIS_313-8872	TroJ	Or-J-II	Thailand	NA	NA	Hap_32	Yes
IRIS_313-8976	TroJ	Or-J-II	United States of America	NA	NA	Hap_32	Yes
IRIS_313-9050	TroJ	Or-J-II	Malaysia	NA	NA	Hap_62	Yes
IRIS_313-9120	TroJ	Or-J-II	India	NA	NA	Hap_32	Yes
IRIS_313-9297	TroJ	Or-J-II	Liberia	NA	NA	Hap_32	Yes
IRIS_313-9389	TroJ	Or-J-II	Philippines	NA	NA	Hap_32	Yes
IRIS_313-9550	TroJ	Or-J-II	United States of America	NA	NA	Hap_32	Yes
IRIS_313-9789	TroJ	Or-J-II	Japan	NA	NA	Hap_32	Yes
IRIS_313-9800	TroJ	Or-J-II	Japan	NA	NA	Hap_32	Yes
CX104	Aro	Or-J-III	Iran	NA	NA	Hap_66	Yes
CX143	Aro	Or-J-III	Iran	NA	NA	Hap_64	Yes
CX149	Aro	Or-J-III	India	NA	NA	Hap_66	Yes
IRIS_313-10521	Aro	Or-J-III	India	NA	NA	Hap_64	Yes
IRIS_313-10670	Aro	Or-J-III	India	NA	NA	Hap_64	Yes
IRIS_313-10732	Aro	Or-J-III	Nepal	NA	NA	Hap_64	Yes
IRIS_313-10851	Aro	Or-J-III	India	NA	NA	Hap_81	No
IRIS_313-10868	Aro	Or-J-III	India	NA	NA	Hap_72	No
IRIS_313-10926	Aro	Or-J-III	Nepal	NA	NA	Hap_64	Yes
IRIS_313-10933	Aro	Or-J-III	India	NA	NA	Hap_82	No
IRIS_313-11021	Aro	Or-J-III	Pakistan	NA	NA	Hap_66	Yes
IRIS_313-11022	Aro	Or-J-III	Pakistan	NA	NA	Hap_66	Yes
IRIS_313-11023	Aro	Or-J-III	Pakistan	NA	NA	Hap_66	Yes
IRIS_313-11026	Aro	Or-J-III	Pakistan	NA	NA	Hap_66	Yes
IRIS_313-11062	Aro	Or-J-III	Bangladesh	NA	NA	Hap_64	Yes
IRIS_313-11218	Aro	Or-J-III	Bangladesh	NA	NA	Hap_64	Yes
IRIS_313-11258	Aro	Or-J-III	India	NA	NA	Hap_64	Yes
IRIS_313-11268	Aro	Or-J-III	India	NA	NA	Hap_64	Yes
IRIS_313-11289	Aro	Or-J-III	India	NA	NA	Hap_64	Yes
IRIS_313-11293	Aro	Or-J-III	India	NA	NA	Hap_64	Yes
IRIS_313-11350	Aro	Or-J-III	India	NA	NA	Hap_64	Yes
IRIS_313-11356	Aro	Or-J-III	India	NA	NA	Hap_64	Yes
IRIS_313-11362	Aro	Or-J-III	India	NA	NA	Hap_64	Yes
IRIS_313-11373	Aro	Or-J-III	India	NA	NA	Hap_73	No
IRIS_313-11625	Aro	Or-J-III	Nepal	NA	NA	Hap_64	Yes
IRIS_313-11626	Aro	Or-J-III	Nepal	NA	NA	Hap_64	Yes
IRIS_313-11630	Aro	Or-J-III	Nepal	NA	NA	Hap_64	Yes
IRIS_313-11824	Aro	Or-J-III	India	NA	NA	Hap_84	No
IRIS_313-11825	Aro	Or-J-III	India	NA	NA	Hap_75	No
IRIS_313-12074	Aro	Or-J-III	Myanmar	NA	NA	Hap_64	Yes
IRIS_313-12094	Aro	Or-J-III	Bangladesh	NA	NA	Hap_64	Yes
IRIS_313-8326	Aro	Or-J-III	India	NA	NA	Hap_64	Yes
IRIS_313-8656	Aro	Or-J-III	Pakistan	NA	NA	Hap_66	Yes
IRIS_313-8765	Aro	Or-J-III	Bhutan	NA	NA	Hap_64	Yes
IRIS_313-8813	Aro	Or-J-III	India	NA	NA	Hap_64	Yes
IRIS_313-8814	Aro	Or-J-III	Bhutan	NA	NA	Hap_64	Yes
IRIS_313-9083	Aro	Or-J-III	India	NA	NA	Hap_90	No
IRIS_313-9170	Aro	Or-J-III	Bangladesh	NA	NA	Hap_64	Yes
IRIS_313-9682	Aro	Or-J-III	Bangladesh	NA	NA	Hap_64	Yes
IRIS_313-10623	Aus	Or-J-III	Nepal	NA	NA	Hap_64	Yes
IRIS_313-10718	Aus	Or-J-III	Sri Lanka	NA	NA	Hap_64	Yes
IRIS_313-10927	Aus	Or-J-III	Nepal	NA	NA	Hap_79	No
IRIS_313-10987	Aus	Or-J-III	Bangladesh	NA	NA	Hap_80	No
IRIS_313-11035	Aus	Or-J-III	Pakistan	NA	NA	Hap_90	No
IRIS_313-11064	Aus	Or-J-III	Bangladesh	NA	NA	Hap_92	No
IRIS_313-11191	Aus	Or-J-III	Sri Lanka	NA	NA	Hap_64	Yes
IRIS_313-11214	Aus	Or-J-III	Bangladesh	NA	NA	Hap_64	Yes
IRIS_313-11353	Aus	Or-J-III	India	NA	NA	Hap_64	Yes
IRIS_313-11451	Aus	Or-J-III	India	NA	NA	Hap_64	Yes
IRIS_313-11765	Aus	Or-J-III	Liberia	NA	NA	Hap_64	Yes
IRIS_313-11963	Aus	Or-J-III	India	NA	NA	Hap_64	Yes
IRIS_313-8252	Aus	Or-J-III	Bangladesh	NA	NA	Hap_76	No
IRIS_313-8321	Aus	Or-J-III	Bangladesh	NA	NA	Hap_74	No
IRIS_313-8398	Aus	Or-J-III	Pakistan	NA	NA	Hap_86	No
IRIS_313-8498	Aus	Or-J-III	India	NA	NA	Hap_64	Yes
IRIS_313-8655	Aus	Or-J-III	Pakistan	NA	NA	Hap_64	Yes
IRIS_313-9516	Aus	Or-J-III	India	NA	NA	Hap_64	Yes
IRIS_313-9629	Aus	Or-J-III	India	NA	NA	Hap_72	No
B009	Ind	Or-J-III	Viet Nam	NA	NA	Hap_64	Yes
B052	Ind	Or-J-III	Madagascar	NA	NA	Hap_64	Yes
CX146	Ind	Or-J-III	India	NA	NA	Hap_64	Yes
IRIS_313-10102	Ind	Or-J-III	Madagascar	NA	NA	Hap_64	Yes
IRIS_313-10235	Ind	Or-J-III	Philippines	NA	NA	Hap_65	No
IRIS_313-10706	Ind	Or-J-III	Malaysia	NA	NA	Hap_96	Yes
IRIS_313-10723	Ind	Or-J-III	Senegal	NA	NA	Hap_64	Yes
IRIS_313-10836	Ind	Or-J-III	India	NA	NA	Hap_64	Yes
IRIS_313-11359	Ind	Or-J-III	India	NA	NA	Hap_64	Yes
IRIS_313-11407	Ind	Or-J-III	India	NA	NA	Hap_64	Yes
IRIS_313-11411	Ind	Or-J-III	Brazil	NA	NA	Hap_68	No
IRIS_313-11418	Ind	Or-J-III	India	NA	NA	Hap_64	Yes
IRIS_313-11500	Ind	Or-J-III	Indonesia	NA	NA	Hap_64	Yes
IRIS_313-11558	Ind	Or-J-III	Bangladesh	NA	NA	Hap_64	Yes
IRIS_313-11632	Ind	Or-J-III	Nepal	NA	NA	Hap_64	Yes
IRIS_313-11647	Ind	Or-J-III	India	NA	NA	Hap_64	Yes
IRIS_313-11761	Ind	Or-J-III	Cote d'Ivoire	NA	NA	Hap_64	Yes
IRIS_313-11772	Ind	Or-J-III	Madagascar	NA	NA	Hap_64	Yes
IRIS_313-11787	Ind	Or-J-III	Gambia	NA	NA	Hap_64	Yes
IRIS_313-11822	Ind	Or-J-III	India	NA	NA	Hap_83	No
IRIS_313-11920	Ind	Or-J-III	Thailand	NA	NA	Hap_64	Yes
IRIS_313-11958	Ind	Or-J-III	Thailand	NA	NA	Hap_96	Yes
IRIS_313-7638	Ind	Or-J-III	Madagascar	NA	NA	Hap_64	Yes
IRIS_313-8184	Ind	Or-J-III	Italy	NA	NA	Hap_66	Yes
IRIS_313-8288	Ind	Or-J-III	Madagascar	NA	NA	Hap_64	Yes
IRIS_313-8450	Ind	Or-J-III	India	NA	NA	Hap_64	Yes
IRIS_313-8614	Ind	Or-J-III	India	NA	NA	Hap_94	No
IRIS_313-8647	Ind	Or-J-III	India	NA	NA	Hap_64	Yes
IRIS_313-8717	Ind	Or-J-III	Bangladesh	NA	NA	Hap_64	Yes
IRIS_313-8922	Ind	Or-J-III	Indonesia	NA	NA	Hap_64	Yes
IRIS_313-9039	Ind	Or-J-III	Sri Lanka	NA	NA	Hap_64	Yes
IRIS_313-9262	Ind	Or-J-III	Bangladesh	NA	NA	Hap_64	Yes
IRIS_313-9400	Ind	Or-J-III	India	NA	NA	Hap_64	Yes
IRIS_313-9551	Ind	Or-J-III	Madagascar	NA	NA	Hap_64	Yes
IRIS_313-9709	Ind	Or-J-III	Madagascar	NA	NA	Hap_64	Yes
IRIS_313-9778	Ind	Or-J-III	Argentina	NA	NA	Hap_64	Yes
IRIS_313-9861	Ind	Or-J-III	Sri Lanka	NA	NA	Hap_88	No
B192	Inter	Or-J-III	Philippines	NA	NA	Hap_64	Yes
IRIS_313-11032	Inter	Or-J-III	Pakistan	NA	NA	Hap_66	Yes
IRIS_313-11417	Inter	Or-J-III	India	NA	NA	Hap_66	Yes
CX65	Jap	Or-J-III	Iran	NA	NA	Hap_66	Yes
IRIS_313-11497	Jap	Or-J-III	Indonesia	NA	NA	Hap_90	No
IRIS_313-11789	Jap	Or-J-III	Madagascar	NA	NA	Hap_64	Yes
IRIS_313-7795	Jap	Or-J-III	Madagascar	NA	NA	Hap_64	Yes
IRIS_313-9783	Jap	Or-J-III	Afghanistan	NA	NA	Hap_66	Yes
W3105	OR	Or-J-III	India	NA	NA	Hap_64	Yes
W3096	OR	Or-J-III	China	NA	NA	Hap_71	Yes
W3094	OR	Or-J-III	China	NA	NA	Hap_71	Yes
W3093	OR	Or-J-III	China	NA	NA	Hap_71	Yes
W3092	OR	Or-J-III	China	NA	NA	Hap_64	Yes
W3077	OR	Or-J-III	China	NA	NA	Hap_71	Yes
W3074	OR	Or-J-III	China	NA	NA	Hap_77	No
W3071	OR	Or-J-III	China	NA	NA	Hap_64	Yes
W3048	OR	Or-J-III	China	NA	NA	Hap_64	Yes
W3045	OR	Or-J-III	China	NA	NA	Hap_71	Yes
W3044	OR	Or-J-III	China	NA	NA	Hap_77	No
W3043	OR	Or-J-III	China	NA	NA	Hap_77	No
W3040	OR	Or-J-III	China	NA	NA	Hap_71	Yes
W3039	OR	Or-J-III	China	NA	NA	Hap_71	Yes
W3038	OR	Or-J-III	China	NA	NA	Hap_64	Yes
W3037	OR	Or-J-III	China	NA	NA	Hap_64	Yes
W3029	OR	Or-J-III	China	NA	NA	Hap_64	Yes
W3018	OR	Or-J-III	China	NA	NA	Hap_64	Yes
W3017	OR	Or-J-III	China	NA	NA	Hap_71	Yes
W3008	OR	Or-J-III	China	NA	NA	Hap_71	Yes
W3007	OR	Or-J-III	China	NA	NA	Hap_64	Yes
W3004	OR	Or-J-III	China	NA	NA	Hap_91	No
W2308	OR	Or-J-III	Laos	NA	NA	Hap_96	Yes
W2193	OR	Or-J-III	India	NA	NA	Hap_64	Yes
W2063	OR	Or-J-III	Bangladesh	NA	NA	Hap_64	Yes
W1957	OR	Or-J-III	China	NA	NA	Hap_78	No
W1952	OR	Or-J-III	China	NA	NA	Hap_71	Yes
W1895	OR	Or-J-III	Thailand	NA	NA	Hap_96	Yes
W1865	OR	Or-J-III	Thailand	NA	NA	Hap_64	Yes
W1854	OR	Or-J-III	Thailand	NA	NA	Hap_96	Yes
W1853	OR	Or-J-III	Thailand	NA	NA	Hap_99	No
W1822	OR	Or-J-III	Bangladesh	NA	NA	Hap_87	No
W1821	OR	Or-J-III	Bangladesh	NA	NA	Hap_64	Yes
W1820	OR	Or-J-III	Bangladesh	NA	NA	Hap_64	Yes
W1818	OR	Or-J-III	Bangladesh	NA	NA	Hap_97	No
W1759	OR	Or-J-III	India	NA	NA	Hap_89	No
W1757	OR	Or-J-III	India	NA	NA	Hap_85	No
W1756	OR	Or-J-III	India	NA	NA	Hap_64	Yes
W1748	OR	Or-J-III	India	NA	NA	Hap_64	Yes
W1747	OR	Or-J-III	India	NA	NA	Hap_69	No
W1741	OR	Or-J-III	India	NA	NA	Hap_67	No
W1740	OR	Or-J-III	India	NA	NA	Hap_64	Yes
W1736	OR	Or-J-III	India	NA	NA	Hap_100	No
W1735	OR	Or-J-III	India	NA	NA	Hap_64	Yes
W1721	OR	Or-J-III	China	NA	NA	Hap_71	Yes
W1719	OR	Or-J-III	China	NA	NA	Hap_102	No
W1683	OR	Or-J-III	India	NA	NA	Hap_64	Yes
W1679	OR	Or-J-III	India	NA	NA	Hap_70	No
W1675	OR	Or-J-III	India	NA	NA	Hap_93	No
W1619	OR	Or-J-III	Thailand	NA	NA	Hap_64	Yes
W1532	OR	Or-J-III	India	NA	NA	Hap_64	Yes
W1121	OR	Or-J-III	India	NA	NA	Hap_64	Yes
W1111	OR	Or-J-III	India	NA	NA	Hap_64	Yes
W1107	OR	Or-J-III	India	NA	NA	Hap_64	Yes
W1102	OR	Or-J-III	India	NA	NA	Hap_64	Yes
W1092	OR	Or-J-III	India	NA	NA	Hap_64	Yes
W1090	OR	Or-J-III	India	NA	NA	Hap_64	Yes
W1086	OR	Or-J-III	India	NA	NA	Hap_64	Yes
W1084	OR	Or-J-III	India	NA	NA	Hap_64	Yes
W1083	OR	Or-J-III	India	NA	NA	Hap_64	Yes
W1082	OR	Or-J-III	India	NA	NA	Hap_64	Yes
W1080	OR	Or-J-III	India	NA	NA	Hap_64	Yes
W0639	OR	Or-J-III	Burma	NA	NA	Hap_64	Yes
W0610	OR	Or-J-III	Burma	NA	NA	Hap_98	No
W0589	OR	Or-J-III	Malaya	NA	NA	Hap_64	Yes
W0574	OR	Or-J-III	Malaya	NA	NA	Hap_64	Yes
W0141	OR	Or-J-III	India	NA	NA	Hap_95	No
W0133	OR	Or-J-III	India	NA	NA	Hap_64	Yes
W0128	OR	Or-J-III	India	NA	NA	Hap_64	Yes
IRIS_313-11458	TemJ	Or-J-III	India	NA	NA	Hap_64	Yes
IRIS_313-11650	TemJ	Or-J-III	India	NA	NA	Hap_64	Yes
IRIS_313-7725	TemJ	Or-J-III	Madagascar	NA	NA	Hap_64	Yes
IRIS_313-9978	TemJ	Or-J-III	Madagascar	NA	NA	Hap_66	Yes
IRIS_313-10272	TroJ	Or-J-III	Colombia	NA	NA	Hap_64	Yes
IRIS_313-11657	TroJ	Or-J-III	Nigeria	NA	NA	Hap_64	Yes
IRIS_313-11738	TroJ	Or-J-III	India	NA	NA	Hap_64	Yes
IRIS_313-15909	TroJ	Or-J-III	India	NA	NA	Hap_66	Yes
W3098	OR	Or-w-I	China	NA	NA	Hap_111	Yes
W3097	OR	Or-w-I	China	NA	NA	Hap_111	Yes
W3090	OR	Or-w-I	China	NA	NA	Hap_111	Yes
W3089	OR	Or-w-I	China	NA	NA	Hap_111	Yes
W3084	OR	Or-w-I	China	NA	NA	Hap_111	Yes
W3070	OR	Or-w-I	China	NA	NA	Hap_106	No
W3069	OR	Or-w-I	China	NA	NA	Hap_106	No
W3059	OR	Or-w-I	China	NA	NA	Hap_110	No
W3015	OR	Or-w-I	China	NA	NA	Hap_109	No
W2198	OR	Or-w-I	China	NA	NA	Hap_109	No
W2025	OR	Or-w-I	Indonesia	NA	NA	Hap_107	No
W2022	OR	Or-w-I	Indonesia	NA	NA	Hap_107	No
W2014	OR	Or-w-I	India	NA	NA	Hap_113	Yes
W2012	OR	Or-w-I	India	NA	NA	Hap_114	No
W2010	OR	Or-w-I	India	NA	NA	Hap_113	Yes
W2005	OR	Or-w-I	India	NA	NA	Hap_118	No
W2003	OR	Or-w-I	India	NA	NA	Hap_117	No
W1998	OR	Or-w-I	India	NA	NA	Hap_113	Yes
W1978	OR	Or-w-I	Indonesia	NA	NA	Hap_108	No
W1919	OR	Or-w-I	Thailand	NA	NA	Hap_104	Yes
W1884	OR	Or-w-I	Thailand	NA	NA	Hap_104	Yes
W1880	OR	Or-w-I	Thailand	NA	NA	Hap_104	Yes
W1850	OR	Or-w-I	Thailand	NA	NA	Hap_103	Yes
W1810	OR	Or-w-I	Sri Lanka	NA	NA	Hap_103	Yes
W1806	OR	Or-w-I	Sri Lanka	NA	NA	Hap_105	No
W1802	OR	Or-w-I	Bangladesh	NA	NA	Hap_103	Yes
W1784	OR	Or-w-I	India	NA	NA	Hap_116	No
W1782	OR	Or-w-I	India	NA	NA	Hap_115	No
W1742	OR	Or-w-I	India	NA	NA	Hap_113	Yes
W1687	OR	Or-w-I	India	NA	NA	Hap_109	No
W1556	OR	Or-w-I	Thailand	NA	NA	Hap_104	Yes
W1122	OR	Or-w-I	India	NA	NA	Hap_103	Yes
W0606	OR	Or-w-I	Malaya	NA	NA	Hap_103	Yes
IRIS_313-10016	Aro	Or-I-I	Iran	NA	NA	Hap_129	Yes
IRIS_313-11563	Aro	Or-I-I	Nepal	NA	NA	Hap_129	Yes
IRIS_313-11566	Aro	Or-I-I	Nepal	NA	NA	Hap_129	Yes
IRIS_313-11629	Aro	Or-I-I	Nepal	NA	NA	Hap_133	Yes
IRIS_313-11695	Aro	Or-I-I	Taiwan	NA	NA	Hap_129	Yes
IRIS_313-11742	Aro	Or-I-I	India	NA	NA	Hap_153	No
IRIS_313-11764	Aro	Or-I-I	Liberia	NA	NA	Hap_129	Yes
IRIS_313-15908	Aro	Or-I-I	Colombia	NA	NA	Hap_160	No
B049	Aus	Or-I-I	Nepal	NA	NA	Hap_129	Yes
B164	Aus	Or-I-I	China	NA	NA	Hap_129	Yes
B221	Aus	Or-I-I	China	NA	NA	Hap_129	Yes
B243	Aus	Or-I-I	China	NA	NA	Hap_129	Yes
CX37	Aus	Or-I-I	Viet Nam	NA	NA	Hap_129	Yes
IRIS_313-10549	Aus	Or-I-I	Pakistan	NA	NA	Hap_133	Yes
IRIS_313-10592	Aus	Or-I-I	Bangladesh	NA	NA	Hap_129	Yes
IRIS_313-10598	Aus	Or-I-I	Bangladesh	NA	NA	Hap_129	Yes
IRIS_313-10604	Aus	Or-I-I	Bangladesh	NA	NA	Hap_133	Yes
IRIS_313-10606	Aus	Or-I-I	Bangladesh	NA	NA	Hap_129	Yes
IRIS_313-10854	Aus	Or-I-I	India	NA	NA	Hap_129	Yes
IRIS_313-10876	Aus	Or-I-I	India	NA	NA	Hap_133	Yes
IRIS_313-10892	Aus	Or-I-I	India	NA	NA	Hap_133	Yes
IRIS_313-10896	Aus	Or-I-I	India	NA	NA	Hap_137	No
IRIS_313-10963	Aus	Or-I-I	Bangladesh	NA	NA	Hap_129	Yes
IRIS_313-10969	Aus	Or-I-I	Brazil	NA	NA	Hap_139	No
IRIS_313-11016	Aus	Or-I-I	Bangladesh	NA	NA	Hap_164	No
IRIS_313-11018	Aus	Or-I-I	Bangladesh	NA	NA	Hap_152	No
IRIS_313-11024	Aus	Or-I-I	Pakistan	NA	NA	Hap_133	Yes
IRIS_313-11027	Aus	Or-I-I	Pakistan	NA	NA	Hap_133	Yes
IRIS_313-11031	Aus	Or-I-I	Pakistan	NA	NA	Hap_133	Yes
IRIS_313-11047	Aus	Or-I-I	Bangladesh	NA	NA	Hap_133	Yes
IRIS_313-11053	Aus	Or-I-I	Bangladesh	NA	NA	Hap_133	Yes
IRIS_313-11059	Aus	Or-I-I	Bangladesh	NA	NA	Hap_129	Yes
IRIS_313-11061	Aus	Or-I-I	Bangladesh	NA	NA	Hap_129	Yes
IRIS_313-11165	Aus	Or-I-I	India	NA	NA	Hap_133	Yes
IRIS_313-11168	Aus	Or-I-I	India	NA	NA	Hap_129	Yes
IRIS_313-11170	Aus	Or-I-I	India	NA	NA	Hap_129	Yes
IRIS_313-11174	Aus	Or-I-I	India	NA	NA	Hap_133	Yes
IRIS_313-11232	Aus	Or-I-I	India	NA	NA	Hap_151	No
IRIS_313-11265	Aus	Or-I-I	India	NA	NA	Hap_129	Yes
IRIS_313-11291	Aus	Or-I-I	India	NA	NA	Hap_136	No
IRIS_313-11322	Aus	Or-I-I	Bangladesh	NA	NA	Hap_129	Yes
IRIS_313-11324	Aus	Or-I-I	Bangladesh	NA	NA	Hap_134	No
IRIS_313-11371	Aus	Or-I-I	India	NA	NA	Hap_159	No
IRIS_313-11454	Aus	Or-I-I	India	NA	NA	Hap_160	No
IRIS_313-11476	Aus	Or-I-I	India	NA	NA	Hap_129	Yes
IRIS_313-11481	Aus	Or-I-I	Bangladesh	NA	NA	Hap_129	Yes
IRIS_313-11483	Aus	Or-I-I	Bangladesh	NA	NA	Hap_129	Yes
IRIS_313-11491	Aus	Or-I-I	India	NA	NA	Hap_131	Yes
IRIS_313-11556	Aus	Or-I-I	Sierra Leone	NA	NA	Hap_154	No
IRIS_313-11594	Aus	Or-I-I	Viet Nam	NA	NA	Hap_131	Yes
IRIS_313-11603	Aus	Or-I-I	India	NA	NA	Hap_129	Yes
IRIS_313-11635	Aus	Or-I-I	Thailand	NA	NA	Hap_129	Yes
IRIS_313-11711	Aus	Or-I-I	Thailand	NA	NA	Hap_129	Yes
IRIS_313-11741	Aus	Or-I-I	Sri Lanka	NA	NA	Hap_129	Yes
IRIS_313-11808	Aus	Or-I-I	Colombia	NA	NA	Hap_129	Yes
IRIS_313-12139	Aus	Or-I-I	Nepal	NA	NA	Hap_133	Yes
IRIS_313-8380	Aus	Or-I-I	China	NA	NA	Hap_156	No
IRIS_313-8390	Aus	Or-I-I	Pakistan	NA	NA	Hap_133	Yes
IRIS_313-8410	Aus	Or-I-I	Bangladesh	NA	NA	Hap_133	Yes
IRIS_313-8554	Aus	Or-I-I	India	NA	NA	Hap_133	Yes
IRIS_313-8721	Aus	Or-I-I	Bangladesh	NA	NA	Hap_133	Yes
IRIS_313-8771	Aus	Or-I-I	India	NA	NA	Hap_129	Yes
IRIS_313-8963	Aus	Or-I-I	Bangladesh	NA	NA	Hap_162	No
IRIS_313-9137	Aus	Or-I-I	India	NA	NA	Hap_133	Yes
IRIS_313-9283	Aus	Or-I-I	Pakistan	NA	NA	Hap_133	Yes
IRIS_313-9368	Aus	Or-I-I	Bangladesh	NA	NA	Hap_133	Yes
IRIS_313-9449	Aus	Or-I-I	Pakistan	NA	NA	Hap_133	Yes
IRIS_313-9626	Aus	Or-I-I	Bangladesh	NA	NA	Hap_161	No
IRIS_313-9758	Aus	Or-I-I	Taiwan	NA	NA	Hap_129	Yes
B010	Ind	Or-I-I	Malaysia	NA	NA	Hap_129	Yes
B011	Ind	Or-I-I	India	NA	NA	Hap_129	Yes
B032	Ind	Or-I-I	India	NA	NA	Hap_129	Yes
B035	Ind	Or-I-I	United States of America	NA	NA	Hap_129	Yes
B061	Ind	Or-I-I	China	NA	NA	Hap_131	Yes
B062	Ind	Or-I-I	China	NA	NA	Hap_129	Yes
B064	Ind	Or-I-I	China	NA	NA	Hap_131	Yes
B083	Ind	Or-I-I	China	NA	NA	Hap_131	Yes
B089	Ind	Or-I-I	China	NA	NA	Hap_129	Yes
B112	Ind	Or-I-I	China	NA	NA	Hap_131	Yes
B113	Ind	Or-I-I	China	NA	NA	Hap_131	Yes
B130	Ind	Or-I-I	China	NA	NA	Hap_129	Yes
B137	Ind	Or-I-I	Philippines	NA	NA	Hap_131	Yes
B150	Ind	Or-I-I	China	NA	NA	Hap_131	Yes
B165	Ind	Or-I-I	China	NA	NA	Hap_129	Yes
B193	Ind	Or-I-I	Cuba	NA	NA	Hap_129	Yes
B200	Ind	Or-I-I	China	NA	NA	Hap_129	Yes
B208	Ind	Or-I-I	China	NA	NA	Hap_129	Yes
B222	Ind	Or-I-I	China	NA	NA	Hap_129	Yes
B232	Ind	Or-I-I	China	NA	NA	Hap_129	Yes
B233	Ind	Or-I-I	China	NA	NA	Hap_129	Yes
B264	Ind	Or-I-I	China	NA	NA	Hap_129	Yes
CX102	Ind	Or-I-I	Taiwan	NA	NA	Hap_129	Yes
CX125	Ind	Or-I-I	China	NA	NA	Hap_129	Yes
CX128	Ind	Or-I-I	Nepal	NA	NA	Hap_129	Yes
CX133	Ind	Or-I-I	China	NA	NA	Hap_131	Yes
CX145	Ind	Or-I-I	China	NA	NA	Hap_129	Yes
CX152	Ind	Or-I-I	Indonesia	NA	NA	Hap_129	Yes
CX154	Ind	Or-I-I	Thailand	NA	NA	Hap_143	No
CX162	Ind	Or-I-I	Taiwan	NA	NA	Hap_129	Yes
CX17	Ind	Or-I-I	China	NA	NA	Hap_129	Yes
CX18	Ind	Or-I-I	China	NA	NA	Hap_129	Yes
CX2	Ind	Or-I-I	Bangladesh	NA	NA	Hap_129	Yes
CX20	Ind	Or-I-I	China	NA	NA	Hap_129	Yes
CX207	Ind	Or-I-I	China	NA	NA	Hap_129	Yes
CX227	Ind	Or-I-I	India	NA	NA	Hap_138	No
CX237	Ind	Or-I-I	Indonesia	NA	NA	Hap_129	Yes
CX276	Ind	Or-I-I	Philippines	NA	NA	Hap_129	Yes
CX319	Ind	Or-I-I	China	NA	NA	Hap_129	Yes
CX341	Ind	Or-I-I	China	NA	NA	Hap_129	Yes
CX348	Ind	Or-I-I	China	NA	NA	Hap_129	Yes
CX358	Ind	Or-I-I	Philippines	NA	NA	Hap_129	Yes
CX392	Ind	Or-I-I	_no_info	NA	NA	Hap_129	Yes
CX394	Ind	Or-I-I	China	NA	NA	Hap_129	Yes
CX43	Ind	Or-I-I	Philippines	NA	NA	Hap_133	Yes
CX50	Ind	Or-I-I	China	NA	NA	Hap_129	Yes
CX69	Ind	Or-I-I	Malaysia	NA	NA	Hap_129	Yes
CX75	Ind	Or-I-I	Sri Lanka	NA	NA	Hap_129	Yes
CX9	Ind	Or-I-I	China	NA	NA	Hap_129	Yes
IRIS_313-10030	Ind	Or-I-I	Madagascar	NA	NA	Hap_129	Yes
IRIS_313-10046	Ind	Or-I-I	Zambia	NA	NA	Hap_129	Yes
IRIS_313-10047	Ind	Or-I-I	Nigeria	NA	NA	Hap_129	Yes
IRIS_313-10050	Ind	Or-I-I	Madagascar	NA	NA	Hap_129	Yes
IRIS_313-10054	Ind	Or-I-I	Panama	NA	NA	Hap_129	Yes
IRIS_313-10103	Ind	Or-I-I	Korea, Republic of	NA	NA	Hap_129	Yes
IRIS_313-10109	Ind	Or-I-I	Nigeria	NA	NA	Hap_129	Yes
IRIS_313-10129	Ind	Or-I-I	China	NA	NA	Hap_144	No
IRIS_313-10154	Ind	Or-I-I	China	NA	NA	Hap_129	Yes
IRIS_313-10161	Ind	Or-I-I	Brazil	NA	NA	Hap_129	Yes
IRIS_313-10168	Ind	Or-I-I	China	NA	NA	Hap_129	Yes
IRIS_313-10170	Ind	Or-I-I	China	NA	NA	Hap_131	Yes
IRIS_313-10171	Ind	Or-I-I	China	NA	NA	Hap_129	Yes
IRIS_313-10178	Ind	Or-I-I	China	NA	NA	Hap_129	Yes
IRIS_313-10189	Ind	Or-I-I	China	NA	NA	Hap_129	Yes
IRIS_313-10191	Ind	Or-I-I	China	NA	NA	Hap_131	Yes
IRIS_313-10224	Ind	Or-I-I	China	NA	NA	Hap_131	Yes
IRIS_313-10257	Ind	Or-I-I	Nicaragua	NA	NA	Hap_129	Yes
IRIS_313-10263	Ind	Or-I-I	Mexico	NA	NA	Hap_129	Yes
IRIS_313-10268	Ind	Or-I-I	Venezuela	NA	NA	Hap_129	Yes
IRIS_313-10289	Ind	Or-I-I	Venezuela	NA	NA	Hap_129	Yes
IRIS_313-10300	Ind	Or-I-I	Colombia	NA	NA	Hap_129	Yes
IRIS_313-10332	Ind	Or-I-I	Indonesia	NA	NA	Hap_129	Yes
IRIS_313-10333	Ind	Or-I-I	Indonesia	NA	NA	Hap_129	Yes
IRIS_313-10334	Ind	Or-I-I	Indonesia	NA	NA	Hap_129	Yes
IRIS_313-10337	Ind	Or-I-I	Indonesia	NA	NA	Hap_129	Yes
IRIS_313-10341	Ind	Or-I-I	Bangladesh	NA	NA	Hap_129	Yes
IRIS_313-10349	Ind	Or-I-I	India	NA	NA	Hap_129	Yes
IRIS_313-10353	Ind	Or-I-I	Korea, Republic of	NA	NA	Hap_129	Yes
IRIS_313-10366	Ind	Or-I-I	Philippines	NA	NA	Hap_129	Yes
IRIS_313-10375	Ind	Or-I-I	Philippines	NA	NA	Hap_129	Yes
IRIS_313-10412	Ind	Or-I-I	Indonesia	NA	NA	Hap_129	Yes
IRIS_313-10428	Ind	Or-I-I	Malaysia	NA	NA	Hap_129	Yes
IRIS_313-10433	Ind	Or-I-I	Philippines	NA	NA	Hap_129	Yes
IRIS_313-10502	Ind	Or-I-I	China	NA	NA	Hap_129	Yes
IRIS_313-10509	Ind	Or-I-I	West Africa	NA	NA	Hap_129	Yes
IRIS_313-10515	Ind	Or-I-I	Taiwan	NA	NA	Hap_131	Yes
IRIS_313-10518	Ind	Or-I-I	Myanmar	NA	NA	Hap_146	Yes
IRIS_313-10519	Ind	Or-I-I	India	NA	NA	Hap_129	Yes
IRIS_313-10527	Ind	Or-I-I	India	NA	NA	Hap_129	Yes
IRIS_313-10566	Ind	Or-I-I	Indonesia	NA	NA	Hap_129	Yes
IRIS_313-10610	Ind	Or-I-I	Sri Lanka	NA	NA	Hap_158	No
IRIS_313-10655	Ind	Or-I-I	Lao People's Democratic Republic	NA	NA	Hap_129	Yes
IRIS_313-10659	Ind	Or-I-I	Lao People's Democratic Republic	NA	NA	Hap_129	Yes
IRIS_313-10676	Ind	Or-I-I	India	NA	NA	Hap_129	Yes
IRIS_313-10680	Ind	Or-I-I	Lao People's Democratic Republic	NA	NA	Hap_129	Yes
IRIS_313-10681	Ind	Or-I-I	Lao People's Democratic Republic	NA	NA	Hap_140	No
IRIS_313-10695	Ind	Or-I-I	Malaysia	NA	NA	Hap_129	Yes
IRIS_313-10701	Ind	Or-I-I	Malaysia	NA	NA	Hap_129	Yes
IRIS_313-10702	Ind	Or-I-I	Malaysia	NA	NA	Hap_129	Yes
IRIS_313-10720	Ind	Or-I-I	Sri Lanka	NA	NA	Hap_158	No
IRIS_313-10728	Ind	Or-I-I	Senegal	NA	NA	Hap_129	Yes
IRIS_313-10757	Ind	Or-I-I	Thailand	NA	NA	Hap_129	Yes
IRIS_313-10774	Ind	Or-I-I	Indonesia	NA	NA	Hap_129	Yes
IRIS_313-10782	Ind	Or-I-I	Indonesia	NA	NA	Hap_129	Yes
IRIS_313-10818	Ind	Or-I-I	Indonesia	NA	NA	Hap_130	No
IRIS_313-10823	Ind	Or-I-I	Indonesia	NA	NA	Hap_129	Yes
IRIS_313-10858	Ind	Or-I-I	India	NA	NA	Hap_129	Yes
IRIS_313-10903	Ind	Or-I-I	Cambodia	NA	NA	Hap_132	No
IRIS_313-10917	Ind	Or-I-I	Philippines	NA	NA	Hap_135	No
IRIS_313-10932	Ind	Or-I-I	China	NA	NA	Hap_129	Yes
IRIS_313-10940	Ind	Or-I-I	Indonesia	NA	NA	Hap_129	Yes
IRIS_313-10962	Ind	Or-I-I	Indonesia	NA	NA	Hap_129	Yes
IRIS_313-10968	Ind	Or-I-I	Brazil	NA	NA	Hap_129	Yes
IRIS_313-10971	Ind	Or-I-I	Bangladesh	NA	NA	Hap_129	Yes
IRIS_313-10975	Ind	Or-I-I	Bangladesh	NA	NA	Hap_146	Yes
IRIS_313-11006	Ind	Or-I-I	Indonesia	NA	NA	Hap_129	Yes
IRIS_313-11080	Ind	Or-I-I	Lao People's Democratic Republic	NA	NA	Hap_129	Yes
IRIS_313-11083	Ind	Or-I-I	Lao People's Democratic Republic	NA	NA	Hap_129	Yes
IRIS_313-11101	Ind	Or-I-I	Liberia	NA	NA	Hap_129	Yes
IRIS_313-11133	Ind	Or-I-I	Myanmar	NA	NA	Hap_129	Yes
IRIS_313-11149	Ind	Or-I-I	Myanmar	NA	NA	Hap_129	Yes
IRIS_313-11180	Ind	Or-I-I	Indonesia	NA	NA	Hap_129	Yes
IRIS_313-11182	Ind	Or-I-I	Indonesia	NA	NA	Hap_129	Yes
IRIS_313-11194	Ind	Or-I-I	Thailand	NA	NA	Hap_129	Yes
IRIS_313-11197	Ind	Or-I-I	India	NA	NA	Hap_129	Yes
IRIS_313-11220	Ind	Or-I-I	Bangladesh	NA	NA	Hap_129	Yes
IRIS_313-11234	Ind	Or-I-I	Philippines	NA	NA	Hap_129	Yes
IRIS_313-11253	Ind	Or-I-I	Surinam	NA	NA	Hap_129	Yes
IRIS_313-11255	Ind	Or-I-I	India	NA	NA	Hap_129	Yes
IRIS_313-11278	Ind	Or-I-I	India	NA	NA	Hap_129	Yes
IRIS_313-11283	Ind	Or-I-I	India	NA	NA	Hap_129	Yes
IRIS_313-11287	Ind	Or-I-I	India	NA	NA	Hap_129	Yes
IRIS_313-11299	Ind	Or-I-I	India	NA	NA	Hap_129	Yes
IRIS_313-11309	Ind	Or-I-I	India	NA	NA	Hap_129	Yes
IRIS_313-11317	Ind	Or-I-I	Indonesia	NA	NA	Hap_145	No
IRIS_313-11338	Ind	Or-I-I	Philippines	NA	NA	Hap_131	Yes
IRIS_313-11388	Ind	Or-I-I	Thailand	NA	NA	Hap_129	Yes
IRIS_313-11393	Ind	Or-I-I	Thailand	NA	NA	Hap_129	Yes
IRIS_313-11395	Ind	Or-I-I	Indonesia	NA	NA	Hap_129	Yes
IRIS_313-11404	Ind	Or-I-I	Bangladesh	NA	NA	Hap_129	Yes
IRIS_313-11436	Ind	Or-I-I	Cote d'Ivoire	NA	NA	Hap_129	Yes
IRIS_313-11442	Ind	Or-I-I	India	NA	NA	Hap_129	Yes
IRIS_313-11471	Ind	Or-I-I	Philippines	NA	NA	Hap_129	Yes
IRIS_313-11505	Ind	Or-I-I	India	NA	NA	Hap_129	Yes
IRIS_313-11516	Ind	Or-I-I	Philippines	NA	NA	Hap_129	Yes
IRIS_313-11530	Ind	Or-I-I	Thailand	NA	NA	Hap_129	Yes
IRIS_313-11543	Ind	Or-I-I	Myanmar	NA	NA	Hap_129	Yes
IRIS_313-11548	Ind	Or-I-I	Myanmar	NA	NA	Hap_129	Yes
IRIS_313-11551	Ind	Or-I-I	Sierra Leone	NA	NA	Hap_129	Yes
IRIS_313-11576	Ind	Or-I-I	China	NA	NA	Hap_142	No
IRIS_313-11608	Ind	Or-I-I	Thailand	NA	NA	Hap_129	Yes
IRIS_313-11636	Ind	Or-I-I	India	NA	NA	Hap_159	No
IRIS_313-11642	Ind	Or-I-I	India	NA	NA	Hap_163	No
IRIS_313-11666	Ind	Or-I-I	China	NA	NA	Hap_129	Yes
IRIS_313-11678	Ind	Or-I-I	Thailand	NA	NA	Hap_129	Yes
IRIS_313-11708	Ind	Or-I-I	Thailand	NA	NA	Hap_129	Yes
IRIS_313-11720	Ind	Or-I-I	Thailand	NA	NA	Hap_129	Yes
IRIS_313-11727	Ind	Or-I-I	China	NA	NA	Hap_131	Yes
IRIS_313-11750	Ind	Or-I-I	China	NA	NA	Hap_129	Yes
IRIS_313-11797	Ind	Or-I-I	China	NA	NA	Hap_131	Yes
IRIS_313-11804	Ind	Or-I-I	China	NA	NA	Hap_131	Yes
IRIS_313-11805	Ind	Or-I-I	China	NA	NA	Hap_129	Yes
IRIS_313-11806	Ind	Or-I-I	China	NA	NA	Hap_131	Yes
IRIS_313-11807	Ind	Or-I-I	Colombia	NA	NA	Hap_129	Yes
IRIS_313-11819	Ind	Or-I-I	Myanmar	NA	NA	Hap_129	Yes
IRIS_313-11838	Ind	Or-I-I	Thailand	NA	NA	Hap_129	Yes
IRIS_313-11840	Ind	Or-I-I	Thailand	NA	NA	Hap_129	Yes
IRIS_313-11852	Ind	Or-I-I	China	NA	NA	Hap_129	Yes
IRIS_313-11854	Ind	Or-I-I	China	NA	NA	Hap_129	Yes
IRIS_313-11859	Ind	Or-I-I	China	NA	NA	Hap_129	Yes
IRIS_313-11863	Ind	Or-I-I	China	NA	NA	Hap_130	No
IRIS_313-11869	Ind	Or-I-I	China	NA	NA	Hap_131	Yes
IRIS_313-11876	Ind	Or-I-I	China	NA	NA	Hap_129	Yes
IRIS_313-11884	Ind	Or-I-I	China	NA	NA	Hap_129	Yes
IRIS_313-11886	Ind	Or-I-I	Philippines	NA	NA	Hap_129	Yes
IRIS_313-11894	Ind	Or-I-I	Viet Nam	NA	NA	Hap_129	Yes
IRIS_313-11905	Ind	Or-I-I	Indonesia	NA	NA	Hap_129	Yes
IRIS_313-11914	Ind	Or-I-I	Burundi	NA	NA	Hap_129	Yes
IRIS_313-11919	Ind	Or-I-I	India	NA	NA	Hap_129	Yes
IRIS_313-11941	Ind	Or-I-I	Burkina Faso	NA	NA	Hap_129	Yes
IRIS_313-11976	Ind	Or-I-I	Sierra Leone	NA	NA	Hap_129	Yes
IRIS_313-11980	Ind	Or-I-I	Taiwan	NA	NA	Hap_131	Yes
IRIS_313-11989	Ind	Or-I-I	Brunei Darussalam	NA	NA	Hap_155	No
IRIS_313-11997	Ind	Or-I-I	Cambodia	NA	NA	Hap_129	Yes
IRIS_313-12017	Ind	Or-I-I	Ghana	NA	NA	Hap_131	Yes
IRIS_313-12033	Ind	Or-I-I	China	NA	NA	Hap_131	Yes
IRIS_313-12039	Ind	Or-I-I	Cambodia	NA	NA	Hap_129	Yes
IRIS_313-12044	Ind	Or-I-I	Cambodia	NA	NA	Hap_129	Yes
IRIS_313-12048	Ind	Or-I-I	Indonesia	NA	NA	Hap_129	Yes
IRIS_313-12080	Ind	Or-I-I	Philippines	NA	NA	Hap_129	Yes
IRIS_313-12121	Ind	Or-I-I	Lao People's Democratic Republic	NA	NA	Hap_129	Yes
IRIS_313-12133	Ind	Or-I-I	Lao People's Democratic Republic	NA	NA	Hap_129	Yes
IRIS_313-12138	Ind	Or-I-I	Bhutan	NA	NA	Hap_129	Yes
IRIS_313-12161	Ind	Or-I-I	Cambodia	NA	NA	Hap_129	Yes
IRIS_313-12190	Ind	Or-I-I	Lao People's Democratic Republic	NA	NA	Hap_129	Yes
IRIS_313-12210	Ind	Or-I-I	Viet Nam	NA	NA	Hap_131	Yes
IRIS_313-12221	Ind	Or-I-I	Lao People's Democratic Republic	NA	NA	Hap_129	Yes
IRIS_313-12231	Ind	Or-I-I	Lao People's Democratic Republic	NA	NA	Hap_129	Yes
IRIS_313-12234	Ind	Or-I-I	China	NA	NA	Hap_129	Yes
IRIS_313-12263	Ind	Or-I-I	Lao People's Democratic Republic	NA	NA	Hap_129	Yes
IRIS_313-12288	Ind	Or-I-I	Myanmar	NA	NA	Hap_129	Yes
IRIS_313-12300	Ind	Or-I-I	Lao People's Democratic Republic	NA	NA	Hap_129	Yes
IRIS_313-15897	Ind	Or-I-I	China	NA	NA	Hap_129	Yes
IRIS_313-15899	Ind	Or-I-I	Philippines	NA	NA	Hap_129	Yes
IRIS_313-7654	Ind	Or-I-I	Cote d'Ivoire	NA	NA	Hap_129	Yes
IRIS_313-7698	Ind	Or-I-I	Philippines	NA	NA	Hap_129	Yes
IRIS_313-7792	Ind	Or-I-I	Madagascar	NA	NA	Hap_129	Yes
IRIS_313-7808	Ind	Or-I-I	Senegal	NA	NA	Hap_129	Yes
IRIS_313-7824	Ind	Or-I-I	Senegal	NA	NA	Hap_129	Yes
IRIS_313-8212	Ind	Or-I-I	Egypt	NA	NA	Hap_129	Yes
IRIS_313-8244	Ind	Or-I-I	Sri Lanka	NA	NA	Hap_148	No
IRIS_313-8368	Ind	Or-I-I	Indonesia	NA	NA	Hap_129	Yes
IRIS_313-8383	Ind	Or-I-I	Philippines	NA	NA	Hap_131	Yes
IRIS_313-8433	Ind	Or-I-I	China	NA	NA	Hap_131	Yes
IRIS_313-8466	Ind	Or-I-I	Thailand	NA	NA	Hap_129	Yes
IRIS_313-8492	Ind	Or-I-I	Malaysia	NA	NA	Hap_129	Yes
IRIS_313-8536	Ind	Or-I-I	Indonesia	NA	NA	Hap_129	Yes
IRIS_313-8571	Ind	Or-I-I	Tanzania	NA	NA	Hap_129	Yes
IRIS_313-8603	Ind	Or-I-I	India	NA	NA	Hap_129	Yes
IRIS_313-8616	Ind	Or-I-I	Philippines	NA	NA	Hap_129	Yes
IRIS_313-8631	Ind	Or-I-I	India	NA	NA	Hap_129	Yes
IRIS_313-8638	Ind	Or-I-I	Lao People's Democratic Republic	NA	NA	Hap_129	Yes
IRIS_313-8645	Ind	Or-I-I	China	NA	NA	Hap_129	Yes
IRIS_313-8660	Ind	Or-I-I	Sri Lanka	NA	NA	Hap_133	Yes
IRIS_313-8681	Ind	Or-I-I	Guinea	NA	NA	Hap_154	No
IRIS_313-8704	Ind	Or-I-I	India	NA	NA	Hap_146	Yes
IRIS_313-8727	Ind	Or-I-I	India	NA	NA	Hap_129	Yes
IRIS_313-8731	Ind	Or-I-I	India	NA	NA	Hap_131	Yes
IRIS_313-8732	Ind	Or-I-I	Thailand	NA	NA	Hap_129	Yes
IRIS_313-8733	Ind	Or-I-I	Bangladesh	NA	NA	Hap_147	No
IRIS_313-8754	Ind	Or-I-I	India	NA	NA	Hap_129	Yes
IRIS_313-8757	Ind	Or-I-I	India	NA	NA	Hap_157	No
IRIS_313-8791	Ind	Or-I-I	Indonesia	NA	NA	Hap_129	Yes
IRIS_313-8796	Ind	Or-I-I	India	NA	NA	Hap_129	Yes
IRIS_313-8864	Ind	Or-I-I	Bangladesh	NA	NA	Hap_129	Yes
IRIS_313-8889	Ind	Or-I-I	China	NA	NA	Hap_142	No
IRIS_313-8895	Ind	Or-I-I	Thailand	NA	NA	Hap_129	Yes
IRIS_313-8900	Ind	Or-I-I	India	NA	NA	Hap_129	Yes
IRIS_313-8914	Ind	Or-I-I	China	NA	NA	Hap_131	Yes
IRIS_313-8924	Ind	Or-I-I	India	NA	NA	Hap_129	Yes
IRIS_313-8930	Ind	Or-I-I	Bangladesh	NA	NA	Hap_129	Yes
IRIS_313-8940	Ind	Or-I-I	China	NA	NA	Hap_129	Yes
IRIS_313-8980	Ind	Or-I-I	Thailand	NA	NA	Hap_129	Yes
IRIS_313-8985	Ind	Or-I-I	Thailand	NA	NA	Hap_129	Yes
IRIS_313-8986	Ind	Or-I-I	India	NA	NA	Hap_141	No
IRIS_313-8996	Ind	Or-I-I	Viet Nam	NA	NA	Hap_129	Yes
IRIS_313-9006	Ind	Or-I-I	Thailand	NA	NA	Hap_129	Yes
IRIS_313-9019	Ind	Or-I-I	Thailand	NA	NA	Hap_129	Yes
IRIS_313-9020	Ind	Or-I-I	Thailand	NA	NA	Hap_129	Yes
IRIS_313-9098	Ind	Or-I-I	Indonesia	NA	NA	Hap_129	Yes
IRIS_313-9111	Ind	Or-I-I	China	NA	NA	Hap_129	Yes
IRIS_313-9115	Ind	Or-I-I	Thailand	NA	NA	Hap_143	No
IRIS_313-9131	Ind	Or-I-I	Viet Nam	NA	NA	Hap_150	No
IRIS_313-9182	Ind	Or-I-I	Myanmar	NA	NA	Hap_129	Yes
IRIS_313-9227	Ind	Or-I-I	Thailand	NA	NA	Hap_129	Yes
IRIS_313-9253	Ind	Or-I-I	China	NA	NA	Hap_131	Yes
IRIS_313-9258	Ind	Or-I-I	India	NA	NA	Hap_163	No
IRIS_313-9288	Ind	Or-I-I	Thailand	NA	NA	Hap_129	Yes
IRIS_313-9314	Ind	Or-I-I	Indonesia	NA	NA	Hap_129	Yes
IRIS_313-9317	Ind	Or-I-I	Viet Nam	NA	NA	Hap_131	Yes
IRIS_313-9388	Ind	Or-I-I	Madagascar	NA	NA	Hap_129	Yes
IRIS_313-9415	Ind	Or-I-I	Thailand	NA	NA	Hap_129	Yes
IRIS_313-9424	Ind	Or-I-I	India	NA	NA	Hap_129	Yes
IRIS_313-9472	Ind	Or-I-I	Sri Lanka	NA	NA	Hap_129	Yes
IRIS_313-9484	Ind	Or-I-I	India	NA	NA	Hap_129	Yes
IRIS_313-9566	Ind	Or-I-I	India	NA	NA	Hap_129	Yes
IRIS_313-9570	Ind	Or-I-I	China	NA	NA	Hap_129	Yes
IRIS_313-9572	Ind	Or-I-I	Bhutan	NA	NA	Hap_129	Yes
IRIS_313-9574	Ind	Or-I-I	Brunei Darussalam	NA	NA	Hap_129	Yes
IRIS_313-9617	Ind	Or-I-I	Bangladesh	NA	NA	Hap_146	Yes
IRIS_313-9669	Ind	Or-I-I	Thailand	NA	NA	Hap_129	Yes
IRIS_313-9695	Ind	Or-I-I	Pakistan	25.28	111.34	Hap_133	Yes
IRIS_313-9696	Ind	Or-I-I	Bangladesh	25.28	111.34	Hap_129	Yes
IRIS_313-9705	Ind	Or-I-I	Taiwan	25.28	111.34	Hap_131	Yes
IRIS_313-9727	Ind	Or-I-I	China	25.28	111.34	Hap_129	Yes
IRIS_313-9730	Ind	Or-I-I	China	25.28	111.34	Hap_129	Yes
IRIS_313-9822	Ind	Or-I-I	Venezuela	26.8	113.55	Hap_129	Yes
IRIS_313-9925	Ind	Or-I-I	Korea, Republic of	22.1	100.79	Hap_129	Yes
IRIS_313-9926	Ind	Or-I-I	Chad	22.1	100.79	Hap_129	Yes
IRIS_313-9966	Ind	Or-I-I	Colombia	23.6	102.01	Hap_129	Yes
CX330	Inter	Or-I-I	Japan	23.6	102.01	Hap_129	Yes
CX431	Inter	Or-I-I	China	23.6	102.01	Hap_129	Yes
IRIS_313-10787	Inter	Or-I-I	Indonesia	22.1	100.79	Hap_129	Yes
IRIS_313-11753	Inter	Or-I-I	China	22.1	100.79	Hap_129	Yes
IRIS_313-8859	Inter	Or-I-I	China	28.23	116.61	Hap_129	Yes
IRIS_313-9593	Inter	Or-I-I	India	28.23	116.61	Hap_129	Yes
B143	Jap	Or-I-I	China	28.23	116.61	Hap_129	Yes
IRIS_313-10293	Jap	Or-I-I	Cuba	28.23	116.61	Hap_129	Yes
IRIS_313-8060	Jap	Or-I-I	Argentina	28.23	116.61	Hap_129	Yes
IRIS_313-8061	Jap	Or-I-I	Argentina	19.62	110.7	Hap_129	Yes
IRIS_313-8164	Jap	Or-I-I	Australia	19.62	110.7	Hap_129	Yes
W3073	OR	Or-I-I	China	19.62	110.7	Hap_129	Yes
W3003	OR	Or-I-I	China	19.62	110.7	Hap_129	Yes
W2052	OR	Or-I-I	Bangladesh	18.65	109.8	Hap_129	Yes
W1879	OR	Or-I-I	Thailand	18.65	109.8	Hap_129	Yes
W1859	OR	Or-I-I	Thailand	18.65	109.8	Hap_129	Yes
W1858	OR	Or-I-I	Thailand	18.65	109.8	Hap_129	Yes
W1117	OR	Or-I-I	India	18.75	109.17	Hap_129	Yes
W0590	OR	Or-I-I	Malaya	19.25	110.46	Hap_129	Yes
W0576	OR	Or-I-I	Malaya	19.25	110.46	Hap_149	No
W0234	OR	Or-I-I	Thailand	19.1	109	Hap_129	Yes
W0180	OR	Or-I-I	Thailand	19.1	109	Hap_129	Yes
CX329	TemJ	Or-I-I	China	18.75	109.17	Hap_129	Yes
IRIS_313-10359	TemJ	Or-I-I	Philippines	18.75	109.17	Hap_129	Yes
IRIS_313-10380	TemJ	Or-I-I	Philippines	19.1	109	Hap_129	Yes
IRIS_313-11437	TemJ	Or-I-I	Mexico	19.1	109	Hap_129	Yes
IRIS_313-11478	TemJ	Or-I-I	India	19.5	109.5	Hap_129	Yes
IRIS_313-11487	TemJ	Or-I-I	Bangladesh	19.5	109.5	Hap_129	Yes
IRIS_313-11535	TemJ	Or-I-I	Thailand	19.1	110.35	Hap_129	Yes
IRIS_313-11671	TemJ	Or-I-I	Nepal	19.1	110.35	Hap_146	Yes
IRIS_313-11706	TemJ	Or-I-I	Thailand	19.1	110.35	Hap_129	Yes
IRIS_313-11747	TemJ	Or-I-I	China	23.73	106.91	Hap_129	Yes
IRIS_313-11828	TemJ	Or-I-I	India	23.9	106.61	Hap_129	Yes
IRIS_313-12054	TemJ	Or-I-I	China	23.9	106.61	Hap_129	Yes
IRIS_313-7688	TemJ	Or-I-I	Philippines	23.9	106.61	Hap_129	Yes
IRIS_313-8058	TemJ	Or-I-I	Argentina	23.9	106.61	Hap_129	Yes
IRIS_313-8069	TemJ	Or-I-I	Romania	22.69	109.27	Hap_129	Yes
IRIS_313-8873	TemJ	Or-I-I	Taiwan	23.17	108.28	Hap_129	Yes
IRIS_313-9160	TemJ	Or-I-I	Senegal	23.17	108.28	Hap_129	Yes
IRIS_313-9575	TemJ	Or-I-I	Thailand	23.39	110.07	Hap_129	Yes
IRIS_313-9963	TemJ	Or-I-I	Sri Lanka	23.39	110.07	Hap_129	Yes
IRIS_313-10190	TroJ	Or-I-I	China	23.07	109.36	Hap_129	Yes
IRIS_313-10314	TroJ	Or-I-I	Ecuador	23.07	109.36	Hap_129	Yes
IRIS_313-11438	TroJ	Or-I-I	Mexico	22.28	109.97	Hap_129	Yes
IRIS_313-11463	TroJ	Or-I-I	Philippines	22.28	109.97	Hap_131	Yes
IRIS_313-11510	TroJ	Or-I-I	Sri Lanka	21.77	108.36	Hap_129	Yes
IRIS_313-11512	TroJ	Or-I-I	Philippines	21.8	109.19	Hap_131	Yes
IRIS_313-11513	TroJ	Or-I-I	Ecuador	21.8	109.19	Hap_129	Yes
IRIS_313-11622	TroJ	Or-I-I	China	21.95	108.61	Hap_131	Yes
IRIS_313-11674	TroJ	Or-I-I	Thailand	23.72	113.02	Hap_129	Yes
IRIS_313-11796	TroJ	Or-I-I	China	23.72	113.02	Hap_129	Yes
IRIS_313-11833	TroJ	Or-I-I	Thailand	23.87	113.53	Hap_129	Yes
IRIS_313-7699	TroJ	Or-I-I	Philippines	23.17	112.89	Hap_129	Yes
IRIS_313-7911	TroJ	Or-I-I	Philippines	22.8	114.46	Hap_129	Yes
IRIS_313-8073	TroJ	Or-I-I	United States of America	23.05	113.75	Hap_133	Yes
IRIS_313-9809	TroJ	Or-I-I	Sri Lanka	23.05	113.75	Hap_129	Yes
IRIS_313-10979	Aus	Or-I-II	Bangladesh	23.29	113.83	Hap_123	Yes
IRIS_313-11112	Aus	Or-I-II	Bangladesh	23.29	113.83	Hap_123	Yes
IRIS_313-11123	Aus	Or-I-II	Bangladesh	23.12	113.26	Hap_123	Yes
IRIS_313-11615	Aus	Or-I-II	Guinea	23.12	113.26	Hap_120	Yes
IRIS_313-8812	Aus	Or-I-II	Indonesia	23.17	112.89	Hap_120	Yes
B006	Ind	Or-I-II	Viet Nam	22.89	112.85	Hap_120	Yes
B075	Ind	Or-I-II	China	22.53	113.04	Hap_121	Yes
B129	Ind	Or-I-II	China	22.38	112.69	Hap_121	Yes
B133	Ind	Or-I-II	China	22.38	112.69	Hap_120	Yes
B207	Ind	Or-I-II	China	22.25	112.79	Hap_120	Yes
CX378	Ind	Or-I-II	China	22.25	112.79	Hap_120	Yes
CX79	Ind	Or-I-II	Viet Nam	22.19	112.31	Hap_120	Yes
IRIS_313-10760	Ind	Or-I-II	Indonesia	22.19	112.31	Hap_120	Yes
IRIS_313-10806	Ind	Or-I-II	Indonesia	21.38	110.25	Hap_120	Yes
IRIS_313-10825	Ind	Or-I-II	Sierra Leone	21.03	105.85	Hap_120	Yes
IRIS_313-10966	Ind	Or-I-II	Brazil	21.03	105.85	Hap_120	Yes
IRIS_313-10986	Ind	Or-I-II	Bangladesh	10.33	106.25	Hap_123	Yes
IRIS_313-11128	Ind	Or-I-II	Myanmar	10.39	107.02	Hap_120	Yes
IRIS_313-11263	Ind	Or-I-II	India	17.57	102.38	Hap_123	Yes
IRIS_313-11384	Ind	Or-I-II	Viet Nam	14.52	105.52	Hap_120	Yes
IRIS_313-11693	Ind	Or-I-II	Taiwan	15.06	105.49	Hap_120	Yes
IRIS_313-11729	Ind	Or-I-II	China	15.12	105.43	Hap_120	Yes
IRIS_313-11734	Ind	Or-I-II	China	15.09	105.46	Hap_120	Yes
IRIS_313-11814	Ind	Or-I-II	Kenya	15.09	105.46	Hap_122	No
IRIS_313-11853	Ind	Or-I-II	China	11.32	104.5	Hap_120	Yes
IRIS_313-11947	Ind	Or-I-II	China	16.49	99.47	Hap_120	Yes
IRIS_313-11950	Ind	Or-I-II	China	16.49	99.47	Hap_120	Yes
IRIS_313-11955	Ind	Or-I-II	China	16.49	99.47	Hap_120	Yes
IRIS_313-12007	Ind	Or-I-II	China	15.13	100.12	Hap_121	Yes
IRIS_313-8341	Ind	Or-I-II	Viet Nam	16.09	100.37	Hap_120	Yes
IRIS_313-8405	Ind	Or-I-II	China	16.21	102.48	Hap_120	Yes
IRIS_313-8407	Ind	Or-I-II	Malaysia	16.57	102.55	Hap_120	Yes
IRIS_313-8474	Ind	Or-I-II	Thailand	17.42	102.46	Hap_120	Yes
IRIS_313-8713	Ind	Or-I-II	Indonesia	14.35	101	Hap_120	Yes
IRIS_313-8909	Ind	Or-I-II	Tanzania	18.01	102.39	Hap_122	No
IRIS_313-9555	Ind	Or-I-II	China	14.5	105.49	Hap_120	Yes
IRIS_313-11217	Inter	Or-I-II	Bangladesh	11.33	104.5	Hap_127	No
W3066	OR	Or-I-II	China	NA	NA	Hap_165	Yes
W3061	OR	Or-I-II	China	3.29	117	Hap_166	No
W3057	OR	Or-I-II	China	24.83	93.93	Hap_165	Yes
W3014	OR	Or-I-II	China	-13.07	142.07	Hap_120	Yes
W3012	OR	Or-I-II	China	-14.3	132.4	Hap_120	Yes
W3010	OR	Or-I-II	China	28.6	81.6	Hap_120	Yes
W3005	OR	Or-I-II	China	22.82	89.55	Hap_165	Yes
W3002	OR	Or-I-II	China	22.82	89.55	Hap_165	Yes
W2272	OR	Or-I-II	Thailand	24.25	89.92	Hap_123	Yes
W2271	OR	Or-I-II	Thailand	24.25	89.92	Hap_123	Yes
W2197	OR	Or-I-II	Indonesia	24.48	91.78	Hap_123	Yes
W2060	OR	Or-I-II	Bangladesh	24.48	91.78	Hap_123	Yes
W2056	OR	Or-I-II	Bangladesh	23.71	90.41	Hap_123	Yes
W2021	OR	Or-I-II	Indonesia	23.71	90.41	Hap_123	Yes
W1981	OR	Or-I-II	Indonesia	23.71	90.41	Hap_123	Yes
W1975	OR	Or-I-II	Indonesia	17.33	96.5	Hap_123	Yes
W1939	OR	Or-I-II	Thailand	3.29	117	Hap_167	No
W1896	OR	Or-I-II	Thailand	3.29	117	Hap_120	Yes
W1891	OR	Or-I-II	Thailand	3.29	117	Hap_123	Yes
W1890	OR	Or-I-II	Thailand	20.18	72.55	Hap_123	Yes
W1862	OR	Or-I-II	Thailand	19.8	72.55	Hap_120	Yes
W1798	OR	Or-I-II	Thailand	19	73.06	Hap_123	Yes
W1795	OR	Or-I-II	Thailand	15.35	74.2	Hap_126	No
W1794	OR	Or-I-II	Thailand	15.3	73.5	Hap_120	Yes
W1553	OR	Or-I-II	Thailand	22.2	73.2	Hap_120	Yes
W1550	OR	Or-I-II	Thailand	22.42	73	Hap_123	Yes
W1295	OR	Or-I-II	Cambodia	18.5	73.15	Hap_123	Yes
W1292	OR	Or-I-II	Indonesia	-2.99	104.76	Hap_123	Yes
W1126	OR	Or-I-II	India	-6.4	106.82	Hap_123	Yes
W0624	OR	Or-I-II	Burma	-6.4	106.82	Hap_123	Yes
W0600	OR	Or-I-II	Malaya	-2.99	104.76	Hap_125	No
W0587	OR	Or-I-II	Malaya	-6.4	106.82	Hap_124	No
IRIS_313-11577	TemJ	Or-I-II	China	NA	NA	Hap_121	Yes
IRIS_313-11724	TemJ	Or-I-II	Guinea	NA	NA	Hap_120	Yes
IRIS_313-8215	Aro	Or-w-II	France	NA	NA	Hap_168	Yes
IRIS_313-10737	Aus	Or-w-II	Nepal	8.54	99.73	Hap_195	Yes
IRIS_313-11051	Aus	Or-w-II	Bangladesh	15.46	100.13	Hap_195	Yes
B242	Ind	Or-w-II	China	14.44	100.9	Hap_168	Yes
IRIS_313-10020	Ind	Or-w-II	Sri Lanka	14.73	102.19	Hap_194	No
IRIS_313-10045	Ind	Or-w-II	Gambia	17.25	104.18	Hap_195	Yes
IRIS_313-10667	Ind	Or-w-II	India	17.25	104.18	Hap_196	No
IRIS_313-11099	Ind	Or-w-II	Sierra Leone	17.85	102.75	Hap_195	Yes
IRIS_313-11779	Ind	Or-w-II	Tanzania	17.85	102.75	Hap_202	Yes
IRIS_313-11939	Ind	Or-w-II	Burkina Faso	17.03	102.91	Hap_202	Yes
IRIS_313-12146	Ind	Or-w-II	Cambodia	17.03	102.91	Hap_202	Yes
IRIS_313-8291	Ind	Or-w-II	Indonesia	17.03	102.91	Hap_202	Yes
IRIS_313-9989	Ind	Or-w-II	Cote d'Ivoire	14.57	100.99	Hap_202	Yes
W3088	OR	Or-w-II	China	14.56	100.98	Hap_170	Yes
W3087	OR	Or-w-II	China	16.82	100.34	Hap_170	Yes
W3085	OR	Or-w-II	China	17.52	100.12	Hap_170	Yes
W3083	OR	Or-w-II	China	17.53	100.12	Hap_170	Yes
W3072	OR	Or-w-II	China	18.35	99.53	Hap_202	Yes
W3068	OR	Or-w-II	China	19.64	99.52	Hap_202	Yes
W3067	OR	Or-w-II	China	19.75	99.73	Hap_202	Yes
W3063	OR	Or-w-II	China	19.56	99.7	Hap_201	Yes
W3062	OR	Or-w-II	China	NA	NA	Hap_201	Yes
W3060	OR	Or-w-II	China	NA	NA	Hap_202	Yes
W3058	OR	Or-w-II	China	13.92	100.59	Hap_193	No
W3052	OR	Or-w-II	China	23.71	90.41	Hap_169	Yes
W3051	OR	Or-w-II	China	23.71	90.41	Hap_169	Yes
W3049	OR	Or-w-II	China	23.71	90.41	Hap_169	Yes
W3034	OR	Or-w-II	China	23.71	90.41	Hap_187	Yes
W3033	OR	Or-w-II	China	23.71	90.41	Hap_169	Yes
W3023	OR	Or-w-II	China	23.71	90.41	Hap_191	No
W3022	OR	Or-w-II	China	23.71	90.41	Hap_187	Yes
W3021	OR	Or-w-II	China	6.93	79.95	Hap_187	Yes
W3020	OR	Or-w-II	China	6.93	79.95	Hap_187	Yes
W3016	OR	Or-w-II	China	6.93	79.95	Hap_188	No
W3013	OR	Or-w-II	China	6.93	79.95	Hap_187	Yes
W3009	OR	Or-w-II	China	6.93	79.95	Hap_168	Yes
W2307	OR	Or-w-II	Laos	23.71	90.41	Hap_217	No
W2303	OR	Or-w-II	Laos	15	100	Hap_216	No
W2302	OR	Or-w-II	Laos	15	100	Hap_215	No
W2299	OR	Or-w-II	Laos	15	100	Hap_214	No
W2298	OR	Or-w-II	Laos	15	100	Hap_214	No
W2296	OR	Or-w-II	Cambodia	15	100	Hap_201	Yes
W2284	OR	Or-w-II	Thailand	15	100	Hap_173	Yes
W2283	OR	Or-w-II	Thailand	12.31	76.66	Hap_173	Yes
W2282	OR	Or-w-II	Thailand	12.31	76.64	Hap_173	Yes
W2275	OR	Or-w-II	Thailand	21.18	81.36	Hap_205	Yes
W2269	OR	Or-w-II	Thailand	21.25	81.63	Hap_207	No
W2265	OR	Or-w-II	Laos	21.25	81.63	Hap_201	Yes
W2263	OR	Or-w-II	Cambodia	21.25	81.63	Hap_205	Yes
W2066	OR	Or-w-II	Nepal	20.27	81.5	Hap_195	Yes
W2064	OR	Or-w-II	Bangladesh	20.27	81.5	Hap_184	Yes
W2053	OR	Or-w-II	Bangladesh	20.27	81.5	Hap_190	No
W2051	OR	Or-w-II	Bangladesh	20.27	81.5	Hap_184	Yes
W1983	OR	Or-w-II	India	18.4	81.68	Hap_186	No
W1976	OR	Or-w-II	Indonesia	26.92	75.82	Hap_184	Yes
W1921	OR	Or-w-II	Thailand	26.92	75.82	Hap_209	No
W1866	OR	Or-w-II	Thailand	26.92	75.82	Hap_206	No
W1857	OR	Or-w-II	Thailand	26.92	75.82	Hap_201	Yes
W1844	OR	Or-w-II	China	26.92	75.82	Hap_189	No
W1839	OR	Or-w-II	China	26.92	75.82	Hap_188	No
W1832	OR	Or-w-II	Thailand	26.92	75.82	Hap_200	No
W1823	OR	Or-w-II	Bangladesh	26.92	75.82	Hap_186	No
W1813	OR	Or-w-II	Sri Lanka	26.92	75.82	Hap_183	Yes
W1807	OR	Or-w-II	Sri Lanka	26.92	75.82	Hap_192	No
W1803	OR	Or-w-II	Sri Lanka	26.92	75.82	Hap_190	No
W1788	OR	Or-w-II	Thailand	19.5	84.81	Hap_210	No
W1787	OR	Or-w-II	Thailand	20.46	85.88	Hap_199	No
W1770	OR	Or-w-II	India	15	100	Hap_176	No
W1766	OR	Or-w-II	India	15	100	Hap_184	Yes
W1762	OR	Or-w-II	India	NA	NA	Hap_178	No
W1761	OR	Or-w-II	India	NA	NA	Hap_180	No
W1754	OR	Or-w-II	India	NA	NA	Hap_180	No
W1753	OR	Or-w-II	India	NA	NA	Hap_173	Yes
W1743	OR	Or-w-II	India	NA	NA	Hap_173	Yes
W1738	OR	Or-w-II	India	14.3	100.55	Hap_177	No
W1737	OR	Or-w-II	India	23.04	88.17	Hap_177	No
W1732	OR	Or-w-II	India	20.14	85.47	Hap_197	No
W1731	OR	Or-w-II	India	20.1	84.48	Hap_173	Yes
W1727	OR	Or-w-II	Thailand	20.09	84.45	Hap_208	No
W1726	OR	Or-w-II	Thailand	20.29	86.01	Hap_205	Yes
W1724	OR	Or-w-II	China	20.29	86.01	Hap_187	Yes
W1723	OR	Or-w-II	China	20.29	86.01	Hap_188	No
W1700	OR	Or-w-II	Thailand	26.34	89.03	Hap_208	No
W1685	OR	Or-w-II	India	14.5	100.89	Hap_173	Yes
W1681	OR	Or-w-II	India	14.54	99.99	Hap_179	No
W1677	OR	Or-w-II	India	15	100	Hap_182	No
W1666	OR	Or-w-II	India	14.6	103.1	Hap_184	Yes
W1551	OR	Or-w-II	Thailand	14.33	100.52	Hap_205	Yes
W1547	OR	Or-w-II	Thailand	14.5	100.89	Hap_205	Yes
W1546	OR	Or-w-II	Thailand	18.8	98.66	Hap_204	No
W1542	OR	Or-w-II	Malaya	14.5	100.89	Hap_212	No
W1534	OR	Or-w-II	India	14.5	100.89	Hap_211	No
W1533	OR	Or-w-II	India	3.14	101.69	Hap_175	No
W1294	OR	Or-w-II	Philippines	28.64	77.23	Hap_195	Yes
W1142	OR	Or-w-II	India	20.46	85.88	Hap_173	Yes
W1124	OR	Or-w-II	India	20.46	85.88	Hap_185	No
W1087	OR	Or-w-II	India	12.82	102.67	Hap_186	No
W0634	OR	Or-w-II	Burma	7.86	124.86	Hap_184	Yes
W0627	OR	Or-w-II	Burma	3.29	117	Hap_213	No
W0605	OR	Or-w-II	Malaya	27.7	85.32	Hap_172	No
W0596	OR	Or-w-II	Malaya	-4.63	138.93	Hap_195	Yes
W0594	OR	Or-w-II	Malaya	7.86	124.86	Hap_195	Yes
W0593	OR	Or-w-II	Malaya	20.46	85.93	Hap_183	Yes
W0573	OR	Or-w-II	Malaya	24.86	92.36	Hap_198	No
W0549	OR	Or-w-II	India	26.59	94.2	Hap_183	Yes
W0173	OR	Or-w-II	Thailand	26.82	94.17	Hap_199	No
W0168	OR	Or-w-II	Thailand	26.82	94.17	Hap_203	No
W0153	OR	Or-w-II	India	26.82	94.17	Hap_183	Yes
W0152	OR	Or-w-II	India	26.82	94.17	Hap_174	No
W0151	OR	Or-w-II	India	26.82	94.17	Hap_173	Yes
W0149	OR	Or-w-II	India	26.2	92.94	Hap_195	Yes
W0144	OR	Or-w-II	Sri Lanka	26.15	91.74	Hap_171	No
W0138	OR	Or-w-II	India	26.15	91.74	Hap_197	No
W0125	OR	Or-w-II	India	26.15	91.74	Hap_197	No
W0107	OR	Or-w-II	India	27	88.4	Hap_181	No
W0101	OR	Or-w-II	India	27	88.4	Hap_171	No
IRIS_313-7719	TemJ	Or-w-II	Mali	27	88.4	Hap_202	Yes
IRIS_313-11810	TroJ	Or-w-II	Kenya	27	88.4	Hap_202	Yes
IRIS_313-11144	Ind	Or-w-III	Myanmar	27	88.4	Hap_222	No
IRIS_313-9072	Ind	Or-w-III	Bangladesh	19.77	96.11	Hap_224	Yes
IRIS_313-9251	Ind	Or-w-III	Indonesia	25.38	97.39	Hap_227	Yes
W3081	OR	Or-w-III	China	19.77	96.11	Hap_225	Yes
W3080	OR	Or-w-III	China	19.77	96.11	Hap_225	Yes
W3079	OR	Or-w-III	China	17.55	96.62	Hap_225	Yes
W3078	OR	Or-w-III	China	17.33	96.5	Hap_225	Yes
W3065	OR	Or-w-III	China	16.8	96.15	Hap_226	Yes
W3064	OR	Or-w-III	China	6	102.25	Hap_226	Yes
W3056	OR	Or-w-III	China	5.8	102.39	Hap_226	Yes
W1552	OR	Or-w-III	Thailand	5.14	102.81	Hap_223	Yes
W0171	OR	Or-w-III	Thailand	3.14	101.69	Hap_225	Yes
IRIS_313-8283	Aus	Or-w-IV	Bangladesh	3.14	101.69	Hap_229	No
IRIS_313-11204	Ind	Or-w-IV	Bangladesh	3.14	101.69	Hap_228	No
W2277	OR	Or-w-IV	Thailand	5.7	102.53	Hap_232	No
W2268	OR	Or-w-IV	Thailand	5.7	102.53	Hap_236	No
W2266	OR	Or-w-IV	Laos	5.7	102.53	Hap_230	Yes
W2036	OR	Or-w-IV	Burma	5.8	102.38	Hap_234	Yes
W1972	OR	Or-w-IV	Indonesia	3.1	101.5	Hap_235	Yes
W1927	OR	Or-w-IV	Thailand	3.1	101.5	Hap_230	Yes
W1825	OR	Or-w-IV	Bangladesh	13	77.6	Hap_231	Yes
W1824	OR	Or-w-IV	Bangladesh	18.08	103.27	Hap_231	Yes
W1555	OR	Or-w-IV	Thailand	18.77	99.97	Hap_230	Yes
W0623	OR	Or-w-IV	Burma	17.42	102.78	Hap_234	Yes
W0621	OR	Or-w-IV	Burma	14.33	100.53	Hap_233	No
IRIS_313-7685	Ind	O-unc	Philippines	15.87	100.99	Hap_239	No
W0652	OB	O-unc		15.87	100.99	Hap_242	No
W0698	OB	O-unc		15.22	102.5	Hap_241	Yes
W1050	OB	O-unc		22.4	88.66	Hap_244	No
W1063	OB	O-unc		22.9	88.25	Hap_241	Yes
W1642	OB	O-unc		23.48	81.1	Hap_243	Yes
W3106	OB	O-unc		23.48	81.1	Hap_239	No
W3104	Ogla	O-unc		7.07	80.3	Hap_240	No
W3031	OR	O-unc	China	10.37	76.37	Hap_221	Yes
W3030	OR	O-unc	China	10.51	76.65	Hap_221	Yes
W3006	OR	O-unc	China	17.05	82.18	Hap_219	No
W3000	OR	O-unc	China	21	85.1	Hap_220	No
W1995	OR	O-unc	India	21	85.1	Hap_238	No
W1959	OR	O-unc	China	20.95	85.1	Hap_218	No
W1792	OR	O-unc	Thailand	20.48	85.85	Hap_128	No
W1739	OR	O-unc	India	NA	NA	Hap_238	No
W1244	OR	O-unc	Nepal	NA	NA	Hap_237	Yes
W0599	OM	O-I	India	NA	NA	Hap_245	Yes
W0636	OM	O-I	India	NA	NA	Hap_256	No
W1235	OM	O-I	India	NA	NA	Hap_247	No
W1239	OM	O-I	India	NA	NA	Hap_247	No
W2110	OM	O-I	Sri Lanka	NA	NA	Hap_254	Yes
W2111	OM	O-I	India	NA	NA	Hap_250	No
W2115	OM	O-I	India	NA	NA	Hap_248	Yes
W2117	OM	O-I	India	NA	NA	Hap_249	No
W2099	OR	O-I	Australia	NA	NA	Hap_248	Yes
W2078	OR	O-I	Australia	NA	NA	Hap_253	No
W2057	OR	O-I	Bangladesh	NA	NA	Hap_248	Yes
W1238	OR	O-I	Neth. New Guinea	NA	NA	Hap_252	No
W1214	OR	O-I	Philippines	NA	NA	Hap_246	No

## Sheet: Table S3
Table S3 The 102 Oryza plastomes used for extracting plastid-origin reads from WGS dataset
Acc. No	Length (bp)	Discription
KX085497.1	134796	Oryza rhizomatis chloroplast, complete genome
MG252500.1	134503	Oryza sativa cultivar N22 voucher IRRI:IRIS 179-1440867 chloroplast, complete genome
NC_036934.1	134750	Oryza coarctata chloroplast, complete genome
MG383937.1	134750	Oryza coarctata chloroplast, complete genome
MF401450.1	134817	Oryza eichingeri chloroplast, complete genome
MF401451.1	135191	Oryza latifolia chloroplast, complete genome
MF401452.1	134748	Oryza rhizomatis chloroplast, complete genome
MF401453.1	135241	Oryza meyeriana chloroplast, complete genome
NC_034758.1	134796	Oryza rhizomatis chloroplast, complete genome
NC_034759.1	134821	Oryza eichingeri chloroplast, complete genome
NC_034760.1	135175	Oryza alta chloroplast, complete genome
NC_034761.1	135150	Oryza grandiglumis chloroplast, complete genome
NC_034762.1	135190	Oryza latifolia chloroplast, complete genome
NC_034763.1	135641	Oryza longiglumis chloroplast, complete genome
NC_034764.1	135731	Oryza ridleyi chloroplast, complete genome
NC_034765.1	136133	Oryza meyeriana chloroplast, complete genome
CP018170.1	134546	Oryza sativa Indica Group cultivar Shuhui498 chloroplast, complete genome
KF359901.1	134785	Oryza nivara chloroplast, complete genome
KF359902.1	134587	Oryza rufipogon chloroplast, complete genome
KF359903.1	134661	Oryza glaberrima chloroplast, complete genome
KF359904.1	134581	Oryza barthii chloroplast, complete genome
KF359905.1	135224	Oryza glumipatula chloroplast, complete genome
KF359906.1	134553	Oryza meridionalis chloroplast, complete genome
KF359907.1	134557	Oryza longistaminata chloroplast, complete genome
KF359908.1	134582	Oryza punctata chloroplast, complete genome
KF359909.1	134596	Oryza minuta chloroplast, complete genome
KF359910.1	134819	Oryza officinalis chloroplast, complete genome
KF359911.1	134796	Oryza rhizomatis chloroplast, complete genome
KF359912.1	134821	Oryza eichingeri chloroplast, complete genome
KF359913.1	135175	Oryza alta chloroplast, complete genome
KF359914.1	135150	Oryza grandiglumis chloroplast, complete genome
KF359915.1	135190	Oryza latifolia chloroplast, complete genome
KF359916.1	135222	Oryza australiensis chloroplast, complete genome
KF359917.1	134644	Oryza brachyantha chloroplast, complete genome
KF359918.1	135641	Oryza longiglumis chloroplast, complete genome
KF359919.1	135731	Oryza ridleyi chloroplast, complete genome
KF359920.1	135942	Oryza granulata chloroplast, complete genome
KF359921.1	136133	Oryza meyeriana chloroplast, complete genome
NC_031333.1	134502	Oryza sativa cultivar TN1 chloroplast, complete genome
NC_030596.1	134604	Oryza brachyantha chloroplast, complete genome
KT992850.1	134604	Oryza brachyantha chloroplast, complete genome
NC_030298.1	135094	Oryza minuta cultivar IRGC 101099 chloroplast, complete genome
KR364802.1	134401	Oryza glumipatula cultivar W1187 chloroplast, complete genome
KR364803.1	134575	Oryza glumipatula cultivar W2201 chloroplast, complete genome
KU705873.1	134493	Oryza sativa Indica Group cultivar RP Bio-226 chloroplast, complete genome
KU179220.1	135094	Oryza minuta cultivar IRGC 101099 chloroplast, complete genome
KT289403.1	134499	Oryza sativa Aromatic Japonica Group cultivar basmati chloroplast, complete genome
KT289404.1	134536	Oryza sativa Tropical Japonica Group chloroplast, complete genome
NC_027676.1	134604	Oryza punctata voucher GEN1233_2 chloroplast, complete genome
KM088016.1	134551	Oryza sativa Japonica Group cultivar Nipponbare chloroplast, complete genome
KM088017.1	134551	Oryza sativa Japonica Group cultivar Yukara chloroplast, complete genome
KM088021.1	134598	Oryza glaberrima chloroplast, complete genome
KM088022.1	134516	Oryza nivara chloroplast, complete genome
KM088023.1	134590	Oryza barthii chloroplast, complete genome
KM088024.1	134558	Oryza longistaminata chloroplast, complete genome
KM103367.1	134502	Oryza sativa cultivar IR8 from South Korea chloroplast, complete genome
KM103368.1	134502	Oryza sativa cultivar IR8 chloroplast, complete genome
KM103369.1	134502	Oryza sativa cultivar TN1 chloroplast, complete genome
KM103370.1	134598	Oryza glaberrima voucher IRGC103937 chloroplast, complete genome
KM103371.1	134598	Oryza barthii voucher IRGC100934 chloroplast, complete genome
KM103372.1	134510	Oryza rufipogon voucher W1588 chloroplast, complete genome
KM103373.1	134556	Oryza meridionalis voucher W1943 chloroplast, complete genome
KM103374.1	134575	Oryza glumipatula voucher W2112 chloroplast, complete genome
KM103375.1	134604	Oryza punctata voucher GEN1233_2 chloroplast, complete genome
KM103377.1	134586	Oryza glaberrima voucher HHU-KNR2013252 from South Korea chloroplast, complete genome
KM103378.1	134585	Oryza barthii voucher IRGC104574 chloroplast, complete genome
KM103379.1	134678	Oryza barthii voucher WAB0028976 chloroplast, complete genome
KM103380.1	134678	Oryza barthii voucher WAB0028903 chloroplast, complete genome
KM103381.1	134613	Oryza barthii voucher WAB0028952 chloroplast, complete genome
KM103382.1	134551	Oryza sativa cultivar Milyang23 voucher WAB0028987 from South Korea chloroplast, complete genome
NC_027460.1	134674	Oryza barthii isolate 103590 chloroplast, complete genome
NC_027461.1	134583	Oryza glumipatula chloroplast, complete genome
NC_027462.1	134567	Oryza longistaminata isolate 103905 chloroplast, complete genome
NC_027463.1	134911	Oryza officinalis chloroplast, complete genome
KM881634.1	134674	Oryza barthii isolate 103590 chloroplast, complete genome
KM881635.1	134603	Oryza barthii isolate 101381 chloroplast, complete genome
KM881636.1	134596	Oryza barthii isolate 104124 chloroplast, complete genome
KM881637.1	134640	Oryza barthii isolate 86481 chloroplast, complete genome
KM881638.1	134606	Oryza glaberrima isolate 104040 chloroplast, complete genome
KM881639.1	134556	Oryza glaberrima isolate 101328 chloroplast, complete genome
KM881640.1	134583	Oryza glumipatula chloroplast, complete genome
KM881641.1	134567	Oryza longistaminata isolate 103905 chloroplast, complete genome
KM881642.1	134563	Oryza longistaminata isolate 81953 chloroplast, complete genome
KM881643.1	134911	Oryza officinalis chloroplast, complete genome
NC_024608.1	135224	Oryza australiensis isolate 86524 chloroplast, complete genome
KJ830774.1	135224	Oryza australiensis isolate 86524 chloroplast, complete genome
KF562709.1	134537	Oryza rufipogon cultivar DongXiang chloroplast, complete genome
KF428978.1	134557	Oryza rufipogon chloroplast, complete genome
JN861109.1	134448	Oryza sativa Indica Group cultivar Hassawi chloroplast, complete genome
JN861110.1	134459	Oryza sativa Indica Group chloroplast, complete genome
NC_017835.1	134544	Oryza rufipogon chloroplast, complete genome
NC_016927.1	134558	Oryza meridionalis chloroplast, complete genome
JN005831.1	134558	Oryza meridionalis voucher AusTRCF 300118_B chloroplast, complete genome
JN005832.1	134544	Oryza rufipogon chloroplast, complete genome
JN005833.1	134557	Oryza rufipogon voucher AusTRCF 309313 chloroplast, complete genome
GU592207.1	134551	Oryza sativa Japonica Group cultivar Nipponbare voucher AC01-1001045 chloroplast, complete genome
NC_008155.1	134496	Oryza sativa Indica Group chloroplast, complete genome
NC_005973.1	134494	Oryza nivara chloroplast, complete genome
AP006728.1	134494	Oryza nivara chloroplast DNA, complete genome
AY522329.1	134496	Oryza sativa Indica Group isolate 93-11 chloroplast, complete genome
AY522330.1	134551	Oryza sativa Japonica Group cultivar Nipponbare chloroplast, complete genome
AY522331.1	134551	Oryza sativa Japonica Group isolate PA64S chloroplast, complete genome
